# Supplementary material for: Coexpression within Integrated Mitochondrial Pathways Reveals Different Networks in Normal and Chemically Treated Transcriptomes
Source: Int J Genomics. 2014 Jun 24;2014:452891. doi: 10.1155/2014/452891 (PMC4095669; doi:10.1155/2014/452891)
Supplement: Supplementary file 1 — We added “Gene list of co-expressed with MRCs” in the Supplementary Material. [file 452891.f1.xlsx]

## Sheet: Common
GENEID	Normal tissues	Chemicals	Entrez Gene ID	symbol	function
6390	1.06403e-44	0	6390	SDHB	succinate dehydrogenase complex, subunit B, iron sulfur (Ip)
1340	2.07905e-46	2.42348e-26	1340	COX6B1	cytochrome c oxidase subunit VIb polypeptide 1 (ubiquitous)
4726	5.45892e-30	9.38404e-26	4726	NDUFS6	NADH dehydrogenase (ubiquinone) Fe-S protein 6, 13kDa (NADH-coenzyme Q reductase)
1350	1.20753e-51	2.28435e-25	1350	COX7C	cytochrome c oxidase subunit VIIc
4722	1.18787e-31	2.28953e-24	4722	NDUFS3	NADH dehydrogenase (ubiquinone) Fe-S protein 3, 30kDa (NADH-coenzyme Q reductase)
64951	1.65071e-32	1.27578e-21	64951	MRPS24	mitochondrial ribosomal protein S24
27089	9.1888e-52	1.41257e-21	27089	UQCRQ	ubiquinol-cytochrome c reductase, complex III subunit VII, 9.5kDa
4738	4.32943e-28	1.88567e-20	4738	NEDD8	neural precursor cell expressed, developmentally down-regulated 8
1329	4.12546e-44	2.47464e-20	1329	COX5B	cytochrome c oxidase subunit Vb
1349	6.50086e-46	1.55848e-19	1349	COX7B	cytochrome c oxidase subunit VIIb
4701	1.14307e-54	1.56964e-19	4701	NDUFA7	NADH dehydrogenase (ubiquinone) 1 alpha subcomplex, 7, 14.5kDa
5694	2.60592e-29	2.22459e-19	5694	PSMB6	proteasome (prosome, macropain) subunit, beta type, 6
4723	3.46739e-44	2.70419e-19	4723	NDUFV1	NADH dehydrogenase (ubiquinone) flavoprotein 1, 51kDa
521	5.32843e-51	3.14964e-19	521	ATP5I	ATP synthase, H+ transporting, mitochondrial Fo complex, subunit E
4694	2.2088e-53	5.11136e-19	4694	NDUFA1	NADH dehydrogenase (ubiquinone) 1 alpha subcomplex, 1, 7.5kDa
339487	2.53383e-09	5.17791e-19	339487	ZBTB8OS	zinc finger and BTB domain containing 8 opposite strand
1652	1.5332e-11	1.06396e-18	1652	DDT	D-dopachrome tautomerase
55967	2.0838e-51	2.17087e-18	55967	NDUFA12	NADH dehydrogenase (ubiquinone) 1 alpha subcomplex, 12
84987	8.33995e-47	2.69521e-18	84987	COX14	COX14 cytochrome c oxidase assembly homolog (S. cerevisiae)
4709	8.18958e-52	3.47419e-18	4709	NDUFB3	NADH dehydrogenase (ubiquinone) 1 beta subcomplex, 3, 12kDa
64976	7.72699e-44	5.37752e-18	64976	MRPL40	mitochondrial ribosomal protein L40
4696	2.18408e-24	1.31841e-17	4696	NDUFA3	NADH dehydrogenase (ubiquinone) 1 alpha subcomplex, 3, 9kDa
9556	1.63372e-18	1.56994e-17	9556	C14orf2	chromosome 14 open reading frame 2
84833	1.12689e-49	6.34841e-17	84833	USMG5	up-regulated during skeletal muscle growth 5 homolog (mouse)
126328	4.1857e-49	6.69082e-17	126328	NDUFA11	NADH dehydrogenase (ubiquinone) 1 alpha subcomplex, 11, 14.7kDa
5827	9.80452e-11	7.24549e-17	5827	PXMP2	peroxisomal membrane protein 2, 22kDa
522	5.43073e-49	8.06328e-17	522	ATP5J	ATP synthase, H+ transporting, mitochondrial Fo complex, subunit F6
84316	1.76841e-12	2.92713e-16	84316	LSMD1	LSM domain containing 1
4725	4.38738e-47	4.99925e-16	4725	NDUFS5	NADH dehydrogenase (ubiquinone) Fe-S protein 5, 15kDa (NADH-coenzyme Q reductase)
79135	3.19257e-11	1.35034e-15	79135	APOO	apolipoprotein O
81892	6.6777e-46	2.17088e-15	81892	SLIRP	SRA stem-loop interacting RNA binding protein
90480	2.93846e-38	2.79853e-15	90480	GADD45GIP1	growth arrest and DNA-damage-inducible, gamma interacting protein 1
114926	2.80423e-12	3.86199e-15	114926	C8orf40	chromosome 8 open reading frame 40
1666	5.88155e-14	4.58547e-15	1666	DECR1	2,4-dienoyl CoA reductase 1, mitochondrial
51241	7.55179e-16	5.1794e-15	51241	COX16	COX16 cytochrome c oxidase assembly homolog (S. cerevisiae)
3420	7.68858e-50	1.12407e-14	3420	IDH3B	isocitrate dehydrogenase 3 (NAD+) beta
6391	3.11794e-15	1.40704e-14	6391	SDHC	succinate dehydrogenase complex, subunit C, integral membrane protein, 15kDa
8802	1.19605e-42	1.71635e-14	8802	SUCLG1	succinate-CoA ligase, alpha subunit
7381	3.33543e-30	2.75276e-14	7381	UQCRB	ubiquinol-cytochrome c reductase binding protein
10591	1.48835e-09	1.23436e-13	10591	C6orf108	chromosome 6 open reading frame 108
7384	9.39106e-43	1.67551e-13	7384	UQCRC1	ubiquinol-cytochrome c reductase core protein I
5264	1.02531e-42	1.84115e-13	5264	PHYH	phytanoyl-CoA 2-hydroxylase
51258	1.21201e-15	3.48762e-13	51258	MRPL51	mitochondrial ribosomal protein L51
4716	1.99537e-44	5.99086e-13	4716	NDUFB10	NADH dehydrogenase (ubiquinone) 1 beta subcomplex, 10, 22kDa
25828	2.12772e-29	6.03723e-13	25828	TXN2	thioredoxin 2
84300	2.48732e-32	8.05293e-13	84300	MNF1	mitochondrial nucleoid factor 1
10632	6.54414e-35	1.10259e-12	10632	ATP5L	ATP synthase, H+ transporting, mitochondrial Fo complex, subunit G
29796	2.82903e-30	1.27767e-12	29796	UQCR10	ubiquinol-cytochrome c reductase, complex III subunit X
4728	7.89287e-49	1.48194e-12	4728	NDUFS8	NADH dehydrogenase (ubiquinone) Fe-S protein 8, 23kDa (NADH-coenzyme Q reductase)
25764	4.46473e-20	1.96466e-12	25764	C15orf63	chromosome 15 open reading frame 63
28957	1.98909e-49	2.47719e-12	28957	MRPS28	mitochondrial ribosomal protein S28
388962	9.65931e-53	2.84557e-12	388962	BOLA3	bolA homolog 3 (E. coli)
4702	1.32352e-31	4.68197e-12	4702	NDUFA8	NADH dehydrogenase (ubiquinone) 1 alpha subcomplex, 8, 19kDa
54539	4.94565e-46	5.03059e-12	54539	NDUFB11	NADH dehydrogenase (ubiquinone) 1 beta subcomplex, 11, 17.3kDa
51142	3.07351e-48	6.26373e-12	51142	CHCHD2	coiled-coil-helix-coiled-coil-helix domain containing 2
2647	7.82403e-08	7.19331e-12	2647	BLOC1S1	biogenesis of lysosomal organelles complex-1, subunit 1
128240	1.0205e-25	9.64724e-12	128240	APOA1BP	apolipoprotein A-I binding protein
374291	9.67572e-18	1.22016e-11	374291	NDUFS7	NADH dehydrogenase (ubiquinone) Fe-S protein 7, 20kDa (NADH-coenzyme Q reductase)
5439	1.2792e-26	1.85581e-11	5439	POLR2J	polymerase (RNA) II (DNA directed) polypeptide J, 13.3kDa
10654	3.66681e-09	2.65658e-11	10654	PMVK	phosphomevalonate kinase
4715	1.96782e-30	3.11746e-11	4715	NDUFB9	NADH dehydrogenase (ubiquinone) 1 beta subcomplex, 9, 22kDa
11258	9.61049e-16	3.75284e-11	11258	DCTN3	dynactin 3 (p22)
54998	5.1782e-26	4.53189e-11	54998	AURKAIP1	aurora kinase A interacting protein 1
5245	2.75429e-10	5.68311e-11	5245	PHB	prohibitin
6150	7.06049e-08	6.19248e-11	6150	MRPL23	mitochondrial ribosomal protein L23
140465	9.23585e-11	7.56395e-11	140465	MYL6B	myosin, light chain 6B, alkali, smooth muscle and non-muscle
79763	1.72294e-20	1.0983e-10	79763	ISOC2	isochorismatase domain containing 2
51081	4.00943e-37	1.93999e-10	51081	MRPS7	mitochondrial ribosomal protein S7
25804	2.34934e-26	2.62315e-10	25804	LSM4	LSM4 homolog, U6 small nuclear RNA associated (S. cerevisiae)
10980	1.54283e-31	3.0147e-10	10980	COPS6	COP9 constitutive photomorphogenic homolog subunit 6 (Arabidopsis)
64975	2.6895e-38	4.29113e-10	64975	MRPL41	mitochondrial ribosomal protein L41
388789	6.65229e-14	4.43697e-10	388789	LINC00493	long intergenic non-protein coding RNA 493
125988	2.08947e-39	4.81103e-10	125988	C19orf70	chromosome 19 open reading frame 70
171425	2.41968e-41	6.49012e-10	171425	CLYBL	citrate lyase beta like
2109	6.93839e-47	6.59402e-10	2109	ETFB	electron-transfer-flavoprotein, beta polypeptide
1345	6.29554e-41	6.66944e-10	1345	COX6C	cytochrome c oxidase subunit VIc
28971	9.1893e-14	7.9104e-10	28971	C11orf67	chromosome 11 open reading frame 67
29099	1.38628e-12	8.10074e-10	29099	COMMD9	COMM domain containing 9
9978	1.93432e-13	9.09945e-10	9978	RBX1	ring-box 1, E3 ubiquitin protein ligase
154791	1.32169e-38	1.16187e-09	154791	C7orf55	chromosome 7 open reading frame 55
514	1.30758e-38	2.05182e-09	514	ATP5E	ATP synthase, H+ transporting, mitochondrial F1 complex, epsilon subunit
5688	1.26285e-10	2.16197e-09	5688	PSMA7	proteasome (prosome, macropain) subunit, alpha type, 7
26521	1.70128e-43	2.40375e-09	26521	TIMM8B	translocase of inner mitochondrial membrane 8 homolog B (yeast)
27258	3.68822e-08	2.48796e-09	27258	LSM3	LSM3 homolog, U6 small nuclear RNA associated (S. cerevisiae)
11315	4.38974e-16	2.98622e-09	11315	PARK7	parkinson protein 7
1347	1.42898e-13	3.098e-09	1347	COX7A2	cytochrome c oxidase subunit VIIa polypeptide 2 (liver)
516	1.98107e-47	4.17441e-09	516	ATP5G1	ATP synthase, H+ transporting, mitochondrial Fo complex, subunit C1 (subunit 9)
4724	2.01868e-34	4.53938e-09	4724	NDUFS4	NADH dehydrogenase (ubiquinone) Fe-S protein 4, 18kDa (NADH-coenzyme Q reductase)
28974	5.43605e-27	4.94188e-09	28974	C19orf53	chromosome 19 open reading frame 53
93974	9.38619e-36	5.25674e-09	93974	ATPIF1	ATPase inhibitory factor 1
78988	5.53745e-12	5.68222e-09	78988	MRP63	mitochondrial ribosomal protein 63
64080	5.50927e-15	6.09271e-09	64080	RBKS	ribokinase
55168	7.71498e-15	7.04251e-09	55168	MRPS18A	mitochondrial ribosomal protein S18A
122704	2.10952e-28	8.46112e-09	122704	MRPL52	mitochondrial ribosomal protein L52
84284	2.85509e-17	9.78903e-09	84284	NTPCR	nucleoside-triphosphatase, cancer-related
4711	9.97991e-55	1.17952e-08	4711	NDUFB5	NADH dehydrogenase (ubiquinone) 1 beta subcomplex, 5, 16kDa
56945	1.45059e-25	1.25473e-08	56945	MRPS22	mitochondrial ribosomal protein S22
4714	3.6267e-24	1.4468e-08	4714	NDUFB8	NADH dehydrogenase (ubiquinone) 1 beta subcomplex, 8, 19kDa
79133	3.39682e-35	1.6047e-08	79133	NDUFAF5	NADH dehydrogenase (ubiquinone) complex I, assembly factor 5
390743	9.85503e-10	1.93604e-08	390743	390743
83862	1.68795e-15	2.03613e-08	83862	TMEM120A	transmembrane protein 120A
4697	3.25599e-25	2.41418e-08	4697	NDUFA4	NADH dehydrogenase (ubiquinone) 1 alpha subcomplex, 4, 9kDa
4720	2.12693e-46	3.13603e-08	4720	NDUFS2	NADH dehydrogenase (ubiquinone) Fe-S protein 2, 49kDa (NADH-coenzyme Q reductase)
79622	5.35038e-13	3.48767e-08	79622	SNRNP25	small nuclear ribonucleoprotein 25kDa (U11/U12)
283377	2.85921e-23	4.51965e-08	283377	SPRYD4	SPRY domain containing 4
4704	6.71533e-40	5.90737e-08	4704	NDUFA9	NADH dehydrogenase (ubiquinone) 1 alpha subcomplex, 9, 39kDa
10449	1.35407e-17	7.03266e-08	10449	ACAA2	acetyl-CoA acyltransferase 2
29085	6.22121e-45	7.27542e-08	29085	PHPT1	phosphohistidine phosphatase 1
5096	1.25992e-28	7.89598e-08	5096	PCCB	propionyl CoA carboxylase, beta polypeptide
51253	3.77669e-19	8.2927e-08	51253	MRPL37	mitochondrial ribosomal protein L37
219927	1.63301e-40	8.6158e-08	219927	MRPL21	mitochondrial ribosomal protein L21
3396	1.04506e-34	9.57903e-08	3396	ICT1	immature colon carcinoma transcript 1
79590	3.70973e-36	9.76181e-08	79590	MRPL24	mitochondrial ribosomal protein L24
518	4.66757e-47	9.79614e-08	518	ATP5G3	ATP synthase, H+ transporting, mitochondrial Fo complex, subunit C3 (subunit 9)

## Sheet: Only in tissues
GENEID	Normal tissues	Chemicals	Entrez Gene ID	symbol	function
145482	1.71186e-55	0.00826403	145482	PTGR2	prostaglandin reductase 2
29078	2.31484e-54	0.209669	29078	NDUFAF4	NADH dehydrogenase (ubiquinone) complex I, assembly factor 4
254428	2.99032e-53	0.65426	254428	SLC41A1	solute carrier family 41, member 1
2631	3.70387e-53	0.200751	2631	GBAS	glioblastoma amplified sequence
7385	1.15819e-52	0.00141089	7385	UQCRC2	ubiquinol-cytochrome c reductase core protein II
140461	1.96456e-52	0.178571	140461	ASB8	ankyrin repeat and SOCS box containing 8
402587	5.68158e-52	4.06496e-06	402587	402587
79442	1.36947e-51	0.225972	79442	LRRC2	leucine rich repeat containing 2
131118	1.73442e-51	4.88872e-07	131118	DNAJC19	DnaJ (Hsp40) homolog, subfamily C, member 19
4779	1.95171e-51	0.0586649	4779	NFE2L1	nuclear factor (erythroid-derived 2)-like 1
79675	2.13414e-51	0.0981285	79675	FASTKD1	FAST kinase domains 1
115286	3.06551e-51	2.32866e-07	115286	SLC25A26	solute carrier family 25 (S-adenosylmethionine carrier), member 26
539	3.47595e-51	0.0241296	539	ATP5O	ATP synthase, H+ transporting, mitochondrial F1 complex, O subunit
3032	5.04257e-51	2.06862e-05	3032	HADHB	hydroxyacyl-CoA dehydrogenase/3-ketoacyl-CoA thiolase/enoyl-CoA hydratase (trifunctional protein), beta subunit
85476	5.93517e-51	0.0132436	85476	GFM1	G elongation factor, mitochondrial 1
4717	1.02337e-50	0.00406249	4717	NDUFC1	NADH dehydrogenase (ubiquinone) 1, subcomplex unknown, 1, 6kDa
4706	1.56629e-50	0.00171577	4706	NDUFAB1	NADH dehydrogenase (ubiquinone) 1, alpha/beta subcomplex, 1, 8kDa
84340	2.05405e-50	0.0620514	84340	GFM2	G elongation factor, mitochondrial 2
5162	2.11961e-50	0.000409331	5162	PDHB	pyruvate dehydrogenase (lipoamide) beta
26273	5.83301e-50	0.165058	26273	FBXO3	F-box protein 3
202333	6.32553e-50	0.957706	202333	CMYA5	cardiomyopathy associated 5
498	9.31142e-50	0.0307784	498	ATP5A1	ATP synthase, H+ transporting, mitochondrial F1 complex, alpha subunit 1, cardiac muscle
388753	3.13297e-49	0.00558048	388753	C1orf31	chromosome 1 open reading frame 31
139322	4.46148e-49	0.0400023	139322	APOOL	apolipoprotein O-like
5563	6.19763e-49	0.64417	5563	PRKAA2	protein kinase, AMP-activated, alpha 2 catalytic subunit
23479	8.87435e-49	0.209834	23479	ISCU	iron-sulfur cluster scaffold homolog (E. coli)
81706	9.54038e-49	1	81706	PPP1R14C	protein phosphatase 1, regulatory (inhibitor) subunit 14C
2806	1.05473e-48	0.0573503	2806	GOT2	glutamic-oxaloacetic transaminase 2, mitochondrial (aspartate aminotransferase 2)
64802	1.14412e-48	0.160393	64802	NMNAT1	nicotinamide nucleotide adenylyltransferase 1
29090	1.26403e-48	0.0013798	29090	TIMM21	translocase of inner mitochondrial membrane 21 homolog (yeast)
81579	1.26537e-48	0.257143	81579	PLA2G12A	phospholipase A2, group XIIA
34	1.36583e-48	0.00661879	34	ACADM	acyl-CoA dehydrogenase, C-4 to C-12 straight chain
400916	1.65418e-48	0.0275649	400916	CHCHD10	coiled-coil-helix-coiled-coil-helix domain containing 10
51650	1.90488e-48	4.58306e-07	51650	MRPS33	mitochondrial ribosomal protein S33
93058	1.90488e-48	0.295643	93058	COQ10A	coenzyme Q10 homolog A (S. cerevisiae)
128977	3.90582e-48	0.870214	128977	C22orf39	chromosome 22 open reading frame 39
26225	4.90901e-48	0.700531	26225	ARL5A	ADP-ribosylation factor-like 5A
51318	5.06119e-48	0.00199266	51318	MRPL35	mitochondrial ribosomal protein L35
10939	5.79909e-48	0.584943	10939	AFG3L2	AFG3 ATPase family gene 3-like 2 (S. cerevisiae)
5160	1.3104e-47	6.02792e-05	5160	PDHA1	pyruvate dehydrogenase (lipoamide) alpha 1
10891	1.3129e-47	0.22313	10891	PPARGC1A	peroxisome proliferator-activated receptor gamma, coactivator 1 alpha
9552	1.43374e-47	0.000197924	9552	SPAG7	sperm associated antigen 7
55101	1.69962e-47	2.6129e-05	55101	ATP5SL	ATP5S-like
8975	2.26929e-47	0.173554	8975	USP13	ubiquitin specific peptidase 13 (isopeptidase T-3)
1845	2.9613e-47	0.170393	1845	DUSP3	dual specificity phosphatase 3
115701	3.28886e-47	0.15858	115701	ALPK2	alpha-kinase 2
80207	3.70821e-47	0.210182	80207	OPA3	optic atrophy 3 (autosomal recessive, with chorea and spastic paraplegia)
513	4.92177e-47	0.0023987	513	ATP5D	ATP synthase, H+ transporting, mitochondrial F1 complex, delta subunit
4191	6.85397e-47	0.00248863	4191	MDH2	malate dehydrogenase 2, NAD (mitochondrial)
178	7.04883e-47	0.114711	178	AGL	amylo-alpha-1, 6-glucosidase, 4-alpha-glucanotransferase
138716	9.04009e-47	0.000115803	138716	RPP25L	ribonuclease P/MRP 25kDa subunit-like
125170	9.49063e-47	0.200978	125170	SMCR7	Smith-Magenis syndrome chromosome region, candidate 7
5523	1.00704e-46	0.146246	5523	PPP2R3A	protein phosphatase 2, regulatory subunit B'', alpha
25912	1.02911e-46	0.00715555	25912	C1orf43	chromosome 1 open reading frame 43
23530	1.07141e-46	0.171497	23530	NNT	nicotinamide nucleotide transhydrogenase
51295	1.43527e-46	0.0385203	51295	ECSIT	ECSIT homolog (Drosophila)
84896	1.4601e-46	0.642171	84896	ATAD1	ATPase family, AAA domain containing 1
4729	1.48078e-46	2.39579e-05	4729	NDUFV2	NADH dehydrogenase (ubiquinone) flavoprotein 2, 24kDa
4700	1.51971e-46	7.44935e-07	4700	NDUFA6	NADH dehydrogenase (ubiquinone) 1 alpha subcomplex, 6, 14kDa
29088	1.77524e-46	0.314796	29088	MRPL15	mitochondrial ribosomal protein L15
9817	2.11463e-46	0.0442828	9817	KEAP1	kelch-like ECH-associated protein 1
23171	2.32111e-46	0.275777	23171	GPD1L	glycerol-3-phosphate dehydrogenase 1-like
4712	2.68092e-46	0.000597804	4712	NDUFB6	NADH dehydrogenase (ubiquinone) 1 beta subcomplex, 6, 17kDa
54583	3.06685e-46	0.0634818	54583	EGLN1	egl nine homolog 1 (C. elegans)
7321	4.09464e-46	0.0946328	7321	UBE2D1	ubiquitin-conjugating enzyme E2D 1
26589	5.47328e-46	0.000128455	26589	MRPL46	mitochondrial ribosomal protein L46
65008	6.28419e-46	0.00186834	65008	MRPL1	mitochondrial ribosomal protein L1
80206	6.81135e-46	0.969607	80206	FHOD3	formin homology 2 domain containing 3
130827	6.85925e-46	0.365511	130827	TMEM182	transmembrane protein 182
205251	7.40994e-46	0.000124722	205251	LINC00116	long intergenic non-protein coding RNA 116
9903	7.90745e-46	0.0458746	9903	KLHL21	kelch-like 21 (Drosophila)
1855	1.27559e-45	0.0785386	1855	DVL1	dishevelled, dsh homolog 1 (Drosophila)
8402	1.37109e-45	1.83594e-05	8402	SLC25A11	solute carrier family 25 (mitochondrial carrier; oxoglutarate carrier), member 11
7386	1.38518e-45	1.91437e-05	7386	UQCRFS1	ubiquinol-cytochrome c reductase, Rieske iron-sulfur polypeptide 1
10542	1.64854e-45	0.00967754	10542	HBXIP	hepatitis B virus x interacting protein
23107	1.84395e-45	0.170059	23107	MRPS27	mitochondrial ribosomal protein S27
9093	1.96e-45	0.033457	9093	DNAJA3	DnaJ (Hsp40) homolog, subfamily A, member 3
167838	2.03599e-45	1	167838	TXLNB	taxilin beta
58528	2.11772e-45	0.20609	58528	RRAGD	Ras-related GTP binding D
8228	2.26122e-45	4.14191e-07	8228	PNPLA4	patatin-like phospholipase domain containing 4
84033	2.38283e-45	0.805422	84033	OBSCN	obscurin, cytoskeletal calmodulin and titin-interacting RhoGEF
55260	5.90887e-45	0.993847	55260	TMEM143	transmembrane protein 143
122416	8.59013e-45	0.371375	122416	ANKRD9	ankyrin repeat domain 9
51778	9.61182e-45	1	51778	MYOZ2	myozenin 2
28958	1.08927e-44	0.0820668	28958	COA3	cytochrome C oxidase assembly factor 3
84675	1.22163e-44	0.0199386	84675	TRIM55	tripartite motif containing 55
23676	1.23912e-44	1	23676	SMPX	small muscle protein, X-linked
157310	1.58024e-44	0.978628	157310	PEBP4	phosphatidylethanolamine-binding protein 4
1737	1.85607e-44	0.236952	1737	DLAT	dihydrolipoamide S-acetyltransferase
1160	2.15797e-44	0.990785	1160	CKMT2	creatine kinase, mitochondrial 2 (sarcomeric)
2170	2.22119e-44	0.864847	2170	FABP3	fatty acid binding protein 3, muscle and heart (mammary-derived growth inhibitor)
84676	4.02452e-44	0.859513	84676	TRIM63	tripartite motif containing 63, E3 ubiquitin protein ligase
84233	5.3372e-44	3.7308e-05	84233	TMEM126A	transmembrane protein 126A
90523	5.74436e-44	0.00742777	90523	MLIP	muscular LMNA-interacting protein
51078	6.27708e-44	0.00251048	51078	THAP4	THAP domain containing 4
4719	6.45423e-44	0.0736906	4719	NDUFS1	NADH dehydrogenase (ubiquinone) Fe-S protein 1, 75kDa (NADH-coenzyme Q reductase)
7416	8.6601e-44	0.269863	7416	VDAC1	voltage-dependent anion channel 1
8209	8.83996e-44	6.17434e-07	8209	C21orf33	chromosome 21 open reading frame 33
4624	9.3597e-44	0.934333	4624	MYH6	myosin, heavy chain 6, cardiac muscle, alpha
9801	1.00671e-43	0.0063284	9801	MRPL19	mitochondrial ribosomal protein L19
137872	1.12024e-43	0.324334	137872	ADHFE1	alcohol dehydrogenase, iron containing, 1
51660	1.21283e-43	0.269203	51660	MPC1	mitochondrial pyruvate carrier 1
64397	1.37257e-43	0.106497	64397	ZFP106	zinc finger protein 106 homolog (mouse)
221662	1.67917e-43	0.131151	221662	RBM24	RNA binding motif protein 24
27231	1.87158e-43	1	27231	NMRK2	nicotinamide riboside kinase 2
5506	2.0622e-43	1	5506	PPP1R3A	protein phosphatase 1, regulatory subunit 3A
90871	2.14267e-43	0.00201955	90871	C9orf123	chromosome 9 open reading frame 123
8050	2.26157e-43	0.180215	8050	PDHX	pyruvate dehydrogenase complex, component X
112495	2.44095e-43	0.152987	112495	GTF3C6	general transcription factor IIIC, polypeptide 6, alpha 35kDa
10749	2.60539e-43	0.0480129	10749	KIF1C	kinesin family member 1C
515	3.0351e-43	0.020137	515	ATP5F1	ATP synthase, H+ transporting, mitochondrial Fo complex, subunit B1
10294	3.12315e-43	0.111464	10294	DNAJA2	DnaJ (Hsp40) homolog, subfamily A, member 2
27247	3.27402e-43	0.000215619	27247	NFU1	NFU1 iron-sulfur cluster scaffold homolog (S. cerevisiae)
10989	3.83477e-43	0.0126554	10989	IMMT	inner membrane protein, mitochondrial
285556	4.97447e-43	0.954753	285556	LOC285556	uncharacterized LOC285556
3418	5.32363e-43	0.0057407	3418	IDH2	isocitrate dehydrogenase 2 (NADP+), mitochondrial
51110	5.83103e-43	0.00292787	51110	LACTB2	lactamase, beta 2
60558	7.99983e-43	0.0690271	60558	GUF1	GUF1 GTPase homolog (S. cerevisiae)
8988	1.11251e-42	0.156365	8988	HSPB3	heat shock 27kDa protein 3
64432	1.14035e-42	0.371539	64432	MRPS25	mitochondrial ribosomal protein S25
400169	1.18068e-42	0.610997	400169	DKFZp451A211	uncharacterized LOC400169
9499	1.20314e-42	1	9499	MYOT	myotilin
3270	1.35237e-42	0.295531	3270	HRC	histidine rich calcium binding protein
51264	1.68573e-42	3.80507e-06	51264	MRPL27	mitochondrial ribosomal protein L27
10975	1.7114e-42	0.260095	10975	UQCR11	ubiquinol-cytochrome c reductase, complex III subunit XI
57470	1.9095e-42	0.154108	57470	LRRC47	leucine rich repeat containing 47
1537	2.05702e-42	0.000156649	1537	CYC1	cytochrome c-1
51647	2.08358e-42	2.67014e-05	51647	FAM96B	family with sequence similarity 96, member B
51649	2.14498e-42	0.0118425	51649	MRPS23	mitochondrial ribosomal protein S23
257019	3.25061e-42	0.694037	257019	FRMD3	FERM domain containing 3
1738	3.4065e-42	0.0661166	1738	DLD	dihydrolipoamide dehydrogenase
3052	3.4065e-42	0.245023	3052	HCCS	holocytochrome c synthase
92235	3.48954e-42	1	92235	DUSP27	dual specificity phosphatase 27 (putative)
83707	3.63957e-42	0.0175633	83707	TRPT1	tRNA phosphotransferase 1
7337	3.91938e-42	0.113497	7337	UBE3A	ubiquitin protein ligase E3A
137682	4.9419e-42	0.101089	137682	NDUFAF6	NADH dehydrogenase (ubiquinone) complex I, assembly factor 6
160760	5.20554e-42	0.041331	160760	PPTC7	PTC7 protein phosphatase homolog (S. cerevisiae)
26027	5.50676e-42	0.59783	26027	ACOT11	acyl-CoA thioesterase 11
8736	6.05274e-42	0.943031	8736	MYOM1	myomesin 1, 185kDa
56203	6.84487e-42	1	56203	LMOD3	leiomodin 3 (fetal)
57017	7.32076e-42	0.186423	57017	COQ9	coenzyme Q9 homolog (S. cerevisiae)
23557	9.68537e-42	7.62215e-06	23557	SNAPIN	SNAP-associated protein
5507	1.09109e-41	0.229575	5507	PPP1R3C	protein phosphatase 1, regulatory subunit 3C
340156	1.20181e-41	1	340156	MYLK4	myosin light chain kinase family, member 4
79933	1.23037e-41	1	79933	SYNPO2L	synaptopodin 2-like
197257	1.33527e-41	0.00493583	197257	LDHD	lactate dehydrogenase D
291	1.41845e-41	0.268015	291	SLC25A4	solute carrier family 25 (mitochondrial carrier; adenine nucleotide translocator), member 4
55208	1.67306e-41	0.0753161	55208	DCUN1D2	DCN1, defective in cullin neddylation 1, domain containing 2 (S. cerevisiae)
5255	2.18851e-41	0.773628	5255	PHKA1	phosphorylase kinase, alpha 1 (muscle)
7419	2.38153e-41	0.123015	7419	VDAC3	voltage-dependent anion channel 3
23078	2.75879e-41	0.0546423	23078	VWA8	von Willebrand factor A domain containing 8
4703	3.1199e-41	0.270089	4703	NEB	nebulin
127495	3.267e-41	1	127495	LRRC39	leucine rich repeat containing 39
146862	3.4209e-41	1	146862	UNC45B	unc-45 homolog B (C. elegans)
65991	3.52155e-41	0.489684	65991	FUNDC2	FUN14 domain containing 2
127018	3.52926e-41	0.000106038	127018	LYPLAL1	lysophospholipase-like 1
6450	4.71487e-41	0.00202533	6450	SH3BGR	SH3 domain binding glutamic acid-rich protein
1653	4.84477e-41	0.127378	1653	DDX1	DEAD (Asp-Glu-Ala-Asp) box helicase 1
23011	4.89411e-41	0.0890411	23011	RAB21	RAB21, member RAS oncogene family
8048	5.05041e-41	0.990785	8048	CSRP3	cysteine and glycine-rich protein 3 (cardiac LIM protein)
9172	5.30495e-41	0.922857	9172	MYOM2	myomesin (M-protein) 2, 165kDa
342527	5.71729e-41	0.925713	342527	SMTNL2	smoothelin-like 2
115265	6.52632e-41	0.996919	115265	DDIT4L	DNA-damage-inducible transcript 4-like
55335	8.00351e-41	0.996919	55335	NIPSNAP3B	nipsnap homolog 3B (C. elegans)
8557	9.97045e-41	0.802931	8557	TCAP	titin-cap (telethonin)
4151	1.04295e-40	0.424079	4151	MB	myoglobin
4707	1.20946e-40	0.257422	4707	NDUFB1	NADH dehydrogenase (ubiquinone) 1 beta subcomplex, 1, 7kDa
131474	1.78446e-40	0.0915184	131474	CHCHD4	coiled-coil-helix-coiled-coil-helix domain containing 4
64965	1.86566e-40	2.77689e-05	64965	MRPS9	mitochondrial ribosomal protein S9
4625	2.03906e-40	0.996919	4625	MYH7	myosin, heavy chain 7, cardiac muscle, beta
51725	2.06648e-40	1	51725	FBXO40	F-box protein 40
93624	2.10096e-40	0.0831522	93624	TADA2B	transcriptional adaptor 2B
124808	2.66031e-40	0.145667	124808	CCDC43	coiled-coil domain containing 43
6345	2.84158e-40	0.790591	6345	SRL	sarcalumenin
27069	3.03579e-40	0.841097	27069	GHITM	growth hormone inducible transmembrane protein
6389	3.07551e-40	0.116617	6389	SDHA	succinate dehydrogenase complex, subunit A, flavoprotein (Fp)
1950	3.60275e-40	1	1950	EGF	epidermal growth factor
5465	3.74691e-40	0.0144989	5465	PPARA	peroxisome proliferator-activated receptor alpha
392780	4.12818e-40	1	392780	392780
125228	4.15941e-40	0.0712976	125228	FAM210A	family with sequence similarity 210, member A
4634	4.21951e-40	0.984688	4634	MYL3	myosin, light chain 3, alkali; ventricular, skeletal, slow
55664	4.7816e-40	0.348161	55664	CDC37L1	cell division cycle 37 homolog (S. cerevisiae)-like 1
57538	5.00399e-40	0.738475	57538	ALPK3	alpha-kinase 3
51023	5.02646e-40	0.0961724	51023	MRPS18C	mitochondrial ribosomal protein S18C
4633	6.5232e-40	0.972605	4633	MYL2	myosin, light chain 2, regulatory, cardiac, slow
60488	6.99622e-40	0.001006	60488	MRPS35	mitochondrial ribosomal protein S35
7134	7.06375e-40	1	7134	TNNC1	troponin C type 1 (slow)
119559	9.21808e-40	0.0803956	119559	SFXN4	sideroflexin 4
10345	1.041e-39	1	10345	TRDN	triadin
1158	1.41551e-39	0.817989	1158	CKM	creatine kinase, muscle
2021	1.71481e-39	0.000826451	2021	ENDOG	endonuclease G
1339	1.71481e-39	0.698359	1339	COX6A2	cytochrome c oxidase subunit VIa polypeptide 2
165904	1.75167e-39	0.191036	165904	XIRP1	xin actin-binding repeat containing 1
55151	1.77942e-39	0.217429	55151	TMEM38B	transmembrane protein 38B
55527	2.1657e-39	0.172026	55527	FEM1A	fem-1 homolog a (C. elegans)
7284	2.30762e-39	0.193278	7284	TUFM	Tu translation elongation factor, mitochondrial
8065	3.26637e-39	0.139738	8065	CUL5	cullin 5
118461	3.44309e-39	1	118461	C10orf71	chromosome 10 open reading frame 71
84331	3.51606e-39	0.159889	84331	FAM195A	family with sequence similarity 195, member A
1482	3.94303e-39	0.963639	1482	NKX2-5	NK2 homeobox 5
26355	3.96695e-39	0.993847	26355	FAM162A	family with sequence similarity 162, member A
148738	3.9937e-39	0.00184454	148738	HFE2	hemochromatosis type 2 (juvenile)
26284	4.0462e-39	0.339862	26284	ERAL1	Era G-protein-like 1 (E. coli)
58498	4.91207e-39	0.963639	58498	MYL7	myosin, light chain 7, regulatory
56181	6.85984e-39	0.208	56181	FAM54B	family with sequence similarity 54, member B
844	7.7163e-39	1	844	CASQ1	calsequestrin 1 (fast-twitch, skeletal muscle)
282996	1.08486e-38	1	282996	RBM20	RNA binding motif protein 20
253017	1.11165e-38	1	253017	TECRL	trans-2,3-enoyl-CoA reductase-like
1346	1.273e-38	0.0414648	1346	COX7A1	cytochrome c oxidase subunit VIIa polypeptide 1 (muscle)
115	1.43984e-38	0.147632	115	ADCY9	adenylate cyclase 9
129446	1.79292e-38	1	129446	XIRP2	xin actin-binding repeat containing 2
27063	1.90611e-38	0.338418	27063	ANKRD1	ankyrin repeat domain 1 (cardiac muscle)
150572	2.52947e-38	0.759374	150572	SMYD1	SET and MYND domain containing 1
28955	3.2411e-38	0.812939	28955	DEXI	Dexi homolog (mouse)
122622	3.25523e-38	0.349968	122622	ADSSL1	adenylosuccinate synthase like 1
6588	3.61829e-38	0.0512544	6588	SLN	sarcolipin
137735	4.20013e-38	1	137735	ABRA	actin-binding Rho activating protein
51204	4.77585e-38	2.94756e-06	51204	TACO1	translational activator of mitochondrially encoded cytochrome c oxidase I
1431	5.86765e-38	0.253274	1431	CS	citrate synthase
55090	6.03816e-38	0.544492	55090	MED9	mediator complex subunit 9
26548	6.39724e-38	1	26548	ITGB1BP2	integrin beta 1 binding protein (melusin) 2
5502	6.98645e-38	0.000979361	5502	PPP1R1A	protein phosphatase 1, regulatory (inhibitor) subunit 1A
4878	7.64538e-38	0.75468	4878	NPPA	natriuretic peptide A
51805	7.87455e-38	0.000393756	51805	COQ3	coenzyme Q3 homolog, methyltransferase (S. cerevisiae)
84816	9.39893e-38	0.00659644	84816	RTN4IP1	reticulon 4 interacting protein 1
161247	1.00768e-37	0.945948	161247	FITM1	fat storage-inducing transmembrane protein 1
26287	1.18884e-37	0.00941559	26287	ANKRD2	ankyrin repeat domain 2 (stretch responsive muscle)
115939	1.75744e-37	0.0457993	115939	TSR3	TSR3, 20S rRNA accumulation, homolog (S. cerevisiae)
488	2.80382e-37	0.0809276	488	ATP2A2	ATPase, Ca++ transporting, cardiac muscle, slow twitch 2
29081	2.81291e-37	1	29081	METTL5	methyltransferase like 5
57644	2.91287e-37	0.993847	57644	MYH7B	myosin, heavy chain 7B, cardiac muscle, beta
4713	2.9527e-37	0.0259376	4713	NDUFB7	NADH dehydrogenase (ubiquinone) 1 beta subcomplex, 7, 18kDa
10456	3.18155e-37	8.52934e-05	10456	HAX1	HCLS1 associated protein X-1
4892	4.40996e-37	0.0287785	4892	NRAP	nebulin-related anchoring protein
8669	4.49602e-37	0.0848476	8669	EIF3J	eukaryotic translation initiation factor 3, subunit J
284612	4.58093e-37	0.536069	284612	SYPL2	synaptophysin-like 2
11162	5.35212e-37	0.102165	11162	NUDT6	nudix (nucleoside diphosphate linked moiety X)-type motif 6
26517	6.80829e-37	0.0190786	26517	TIMM13	translocase of inner mitochondrial membrane 13 homolog (yeast)
58	7.94724e-37	0.981654	58	ACTA1	actin, alpha 1, skeletal muscle
3839	8.06428e-37	0.0408217	3839	KPNA3	karyopherin alpha 3 (importin alpha 4)
56888	8.06428e-37	0.144854	56888	KCMF1	potassium channel modulatory factor 1
54989	9.25694e-37	0.0198494	54989	ZNF770	zinc finger protein 770
53405	9.46951e-37	0.273159	53405	CLIC5	chloride intracellular channel 5
200539	1.03419e-36	0.864847	200539	ANKRD23	ankyrin repeat domain 23
7139	1.11408e-36	0.790591	7139	TNNT2	troponin T type 2 (cardiac)
255798	1.33809e-36	1	255798	C3orf43	chromosome 3 open reading frame 43
127294	1.36321e-36	0.301169	127294	MYOM3	myomesin family, member 3
10324	1.38237e-36	0.766469	10324	KBTBD10	kelch repeat and BTB (POZ) domain containing 10
57646	1.41535e-36	0.170935	57646	USP28	ubiquitin specific peptidase 28
10440	1.50137e-36	0.166705	10440	TIMM17A	translocase of inner mitochondrial membrane 17 homolog A (yeast)
10476	1.9234e-36	0.993847	10476	ATP5H	ATP synthase, H+ transporting, mitochondrial Fo complex, subunit d
55353	2.11082e-36	0.0205412	55353	LAPTM4B	lysosomal protein transmembrane 4 beta
1140	3.01837e-36	0.259601	1140	CHRNB1	cholinergic receptor, nicotinic, beta 1 (muscle)
57729	3.84152e-36	0.925713	57729	57729
51115	4.23289e-36	0.00946147	51115	FAM82B	family with sequence similarity 82, member B
148646	4.83944e-36	0.31439	148646	148646
3768	4.93722e-36	0.996919	3768	KCNJ12	potassium inwardly-rectifying channel, subfamily J, member 12
123722	5.13795e-36	0.118075	123722	FSD2	fibronectin type III and SPRY domain containing 2
53354	5.19754e-36	0.0613889	53354	PANK1	pantothenate kinase 1
55410	6.36674e-36	1	55410	NCRNA00185	non-protein coding RNA 185
10527	7.4176e-36	0.0958698	10527	IPO7	importin 7
84967	9.43387e-36	0.000408475	84967	LSM10	LSM10, U7 small nuclear RNA associated
7137	9.5893e-36	0.810426	7137	TNNI3	troponin I type 3 (cardiac)
23066	9.64429e-36	0.835907	23066	CAND2	cullin-associated and neddylation-dissociated 2 (putative)
11156	1.04341e-35	0.77603	11156	PTP4A3	protein tyrosine phosphatase type IVA, member 3
145853	1.08686e-35	0.0786384	145853	C15orf61	chromosome 15 open reading frame 61
113622	1.10857e-35	0.0445718	113622	ADPRHL1	ADP-ribosylhydrolase like 1
4708	1.11598e-35	1.87276e-05	4708	NDUFB2	NADH dehydrogenase (ubiquinone) 1 beta subcomplex, 2, 8kDa
7273	1.13071e-35	0.38122	7273	TTN	titin
203859	1.15016e-35	0.0872551	203859	ANO5	anoctamin 5
9553	1.25566e-35	1.91553e-05	9553	MRPL33	mitochondrial ribosomal protein L33
4528	1.27288e-35	0.210182	4528	MTIF2	mitochondrial translational initiation factor 2
83636	1.34865e-35	0.11509	83636	C19orf12	chromosome 19 open reading frame 12
8604	1.51798e-35	0.0785386	8604	SLC25A12	solute carrier family 25 (aspartate/glutamate carrier), member 12
201140	1.95326e-35	0.848942	201140	DHRS7C	dehydrogenase/reductase (SDR family) member 7C
284723	2.16776e-35	0.771235	284723	SLC25A34	solute carrier family 25, member 34
2287	2.62524e-35	0.00151162	2287	FKBP3	FK506 binding protein 3, 25kDa
6905	3.00009e-35	0.257422	6905	TBCE	tubulin folding cofactor E
23439	3.11288e-35	1	23439	ATP1B4	ATPase, Na+/K+ transporting, beta 4 polypeptide
58529	3.57797e-35	0.40083	58529	MYOZ1	myozenin 1
54800	3.78955e-35	0.100459	54800	KLHL24	kelch-like 24 (Drosophila)
10987	4.22177e-35	0.0186326	10987	COPS5	COP9 constitutive photomorphogenic homolog subunit 5 (Arabidopsis)
6445	4.25488e-35	1	6445	SGCG	sarcoglycan, gamma (35kDa dystrophin-associated glycoprotein)
4862	5.80292e-35	0.197194	4862	NPAS2	neuronal PAS domain protein 2
64981	5.97766e-35	0.0394702	64981	MRPL34	mitochondrial ribosomal protein L34
257240	7.16765e-35	1	257240	KLHL34	kelch-like 34 (Drosophila)
10922	7.40447e-35	0.00211331	10922	FASTK	Fas-activated serine/threonine kinase
29763	7.79808e-35	0.347845	29763	PACSIN3	protein kinase C and casein kinase substrate in neurons 3
3313	8.73348e-35	0.337399	3313	HSPA9	heat shock 70kDa protein 9 (mortalin)
26504	8.98244e-35	0.193248	26504	CNNM4	cyclin M4
166348	9.42229e-35	1	166348	KBTBD12	kelch repeat and BTB (POZ) domain containing 12
51073	9.8246e-35	0.0197387	51073	MRPL4	mitochondrial ribosomal protein L4
63933	1.1029e-34	0.656296	63933	CCDC90A	coiled-coil domain containing 90A
11155	1.11275e-34	0.0491365	11155	LDB3	LIM domain binding 3
285489	1.17821e-34	0.707085	285489	DOK7	docking protein 7
7138	1.89583e-34	1	7138	TNNT1	troponin T type 1 (skeletal, slow)
23417	2.11959e-34	0.230302	23417	MLYCD	malonyl-CoA decarboxylase
57159	2.19977e-34	0.951809	57159	TRIM54	tripartite motif containing 54
51619	2.24423e-34	0.856858	51619	UBE2D4	ubiquitin-conjugating enzyme E2D 4 (putative)
4635	2.85301e-34	0.22313	4635	MYL4	myosin, light chain 4, alkali; atrial, embryonic
2027	2.90343e-34	2.32749e-07	2027	ENO3	enolase 3 (beta, muscle)
5236	3.24285e-34	0.0458517	5236	PGM1	phosphoglucomutase 1
9380	3.33524e-34	0.00230014	9380	GRHPR	glyoxylate reductase/hydroxypyruvate reductase
79154	4.49959e-34	0.011084	79154	DHRS11	dehydrogenase/reductase (SDR family) member 11
51300	5.89262e-34	3.06278e-07	51300	TIMMDC1	translocase of inner mitochondrial membrane domain containing 1
2271	6.98072e-34	8.13004e-05	2271	FH	fumarate hydratase
51263	7.31264e-34	0.0528598	51263	MRPL30	mitochondrial ribosomal protein L30
84812	7.68901e-34	0.474623	84812	PLCD4	phospholipase C, delta 4
25822	9.07137e-34	0.908708	25822	DNAJB5	DnaJ (Hsp40) homolog, subfamily B, member 5
54516	9.14196e-34	0.247617	54516	MTRF1L	mitochondrial translational release factor 1-like
88	1.00332e-33	0.368288	88	ACTN2	actinin, alpha 2
4522	1.06113e-33	0.00477186	4522	MTHFD1	methylenetetrahydrofolate dehydrogenase (NADP+ dependent) 1, methenyltetrahydrofolate cyclohydrolase, formyltetrahydrofolate synthetase
92259	1.14495e-33	0.0669654	92259	MRPS36	mitochondrial ribosomal protein S36
51069	1.16677e-33	0.0855122	51069	MRPL2	mitochondrial ribosomal protein L2
9551	1.40948e-33	0.987732	9551	ATP5J2	ATP synthase, H+ transporting, mitochondrial Fo complex, subunit F2
84988	1.46185e-33	0.319728	84988	PPP1R16A	protein phosphatase 1, regulatory subunit 16A
6182	1.93646e-33	0.0145961	6182	MRPL12	mitochondrial ribosomal protein L12
203	2.9657e-33	7.67804e-06	203	AK1	adenylate kinase 1
80273	3.7024e-33	0.0733981	80273	GRPEL1	GrpE-like 1, mitochondrial (E. coli)
285343	3.91886e-33	0.00268365	285343	C3orf23	chromosome 3 open reading frame 23
4731	4.12634e-33	0.0368275	4731	NDUFV3	NADH dehydrogenase (ubiquinone) flavoprotein 3, 10kDa
56061	4.20053e-33	0.159454	56061	UBFD1	ubiquitin family domain containing 1
10930	5.26192e-33	0.4543	10930	APOBEC2	apolipoprotein B mRNA editing enzyme, catalytic polypeptide-like 2
54927	5.44755e-33	0.00429774	54927	CHCHD3	coiled-coil-helix-coiled-coil-helix domain containing 3
226	6.62815e-33	0.230244	226	ALDOA	aldolase A, fructose-bisphosphate
84263	7.46706e-33	0.0311876	84263	HSDL2	hydroxysteroid dehydrogenase like 2
83460	7.61303e-33	0.679113	83460	EMC6	ER membrane protein complex subunit 6
55735	7.89623e-33	0.186834	55735	DNAJC11	DnaJ (Hsp40) homolog, subfamily C, member 11
84274	8.98011e-33	5.75928e-06	84274	COQ5	coenzyme Q5 homolog, methyltransferase (S. cerevisiae)
5837	9.36555e-33	0.38968	5837	PYGM	phosphorylase, glycogen, muscle
10452	1.04245e-32	0.0388916	10452	TOMM40	translocase of outer mitochondrial membrane 40 homolog (yeast)
92080	1.09089e-32	0.996919	92080	92080
5250	1.12162e-32	0.122547	5250	SLC25A3	solute carrier family 25 (mitochondrial carrier; phosphate carrier), member 3
7135	1.41733e-32	1	7135	TNNI1	troponin I type 1 (skeletal, slow)
51103	1.52278e-32	0.00234543	51103	NDUFAF1	NADH dehydrogenase (ubiquinone) complex I, assembly factor 1
3030	1.79324e-32	0.12362	3030	HADHA	hydroxyacyl-CoA dehydrogenase/3-ketoacyl-CoA thiolase/enoyl-CoA hydratase (trifunctional protein), alpha subunit
3177	1.96299e-32	0.230303	3177	SLC29A2	solute carrier family 29 (nucleoside transporters), member 2
81889	2.05041e-32	0.0127226	81889	FAHD1	fumarylacetoacetate hydrolase domain containing 1
51079	2.15951e-32	0.134984	51079	NDUFA13	NADH dehydrogenase (ubiquinone) 1 alpha subcomplex, 13
84814	2.6122e-32	0.369445	84814	PPAPDC3	phosphatidic acid phosphatase type 2 domain containing 3
8266	2.75877e-32	0.0856705	8266	UBL4A	ubiquitin-like 4A
122961	3.41048e-32	0.00856113	122961	ISCA2	iron-sulfur cluster assembly 2 homolog (S. cerevisiae)
399951	4.32071e-32	0.183694	399951	399951
88523	5.00472e-32	0.601563	88523	88523
4626	5.20552e-32	0.993847	4626	MYH8	myosin, heavy chain 8, skeletal muscle, perinatal
84940	6.83145e-32	0.957706	84940	CORO6	coronin 6
51021	6.90598e-32	1.66039e-05	51021	MRPS16	mitochondrial ribosomal protein S16
10651	6.93019e-32	6.67235e-06	10651	MTX2	metaxin 2
8803	8.57576e-32	0.126167	8803	SUCLA2	succinate-CoA ligase, ADP-forming, beta subunit
80017	9.44769e-32	0.851573	80017	C14orf159	chromosome 14 open reading frame 159
23277	9.93117e-32	0.299765	23277	KIAA0664	KIAA0664
84279	1.41551e-31	3.53829e-06	84279	PRADC1	protease-associated domain containing 1
4879	1.5818e-31	0.122014	4879	NPPB	natriuretic peptide B
10302	1.58725e-31	4.03869e-06	10302	SNAPC5	small nuclear RNA activating complex, polypeptide 5, 19kDa
5224	1.63094e-31	0.993847	5224	PGAM2	phosphoglycerate mutase 2 (muscle)
6123	1.72585e-31	0.0488184	6123	RPL3L	ribosomal protein L3-like
845	2.00341e-31	0.143475	845	CASQ2	calsequestrin 2 (cardiac muscle)
79077	2.36767e-31	0.00229399	79077	DCTPP1	dCTP pyrophosphatase 1
64756	2.48126e-31	0.00529061	64756	ATPAF1	ATP synthase mitochondrial F1 complex assembly factor 1
7326	2.86944e-31	0.0455188	7326	UBE2G1	ubiquitin-conjugating enzyme E2G 1
4632	3.71269e-31	0.170935	4632	MYL1	myosin, light chain 1, alkali; skeletal, fast
246329	3.72812e-31	0.188301	246329	STAC3	SH3 and cysteine rich domain 3
27145	4.06852e-31	1	27145	FILIP1	filamin A interacting protein 1
140456	4.08164e-31	0.978628	140456	ASB11	ankyrin repeat and SOCS box containing 11
137902	4.81698e-31	1	137902	PXDNL	peroxidasin homolog (Drosophila)-like
26073	5.50472e-31	1.02218e-07	26073	POLDIP2	polymerase (DNA-directed), delta interacting protein 2
11059	5.63852e-31	0.0826478	11059	WWP1	WW domain containing E3 ubiquitin protein ligase 1
5144	6.53699e-31	0.987732	5144	PDE4D	phosphodiesterase 4D, cAMP-specific
4967	7.0098e-31	0.49584	4967	OGDH	oxoglutarate (alpha-ketoglutarate) dehydrogenase (lipoamide)
80142	7.04631e-31	0.37145	80142	PTGES2	prostaglandin E synthase 2
53373	7.45312e-31	0.583124	53373	TPCN1	two pore segment channel 1
89910	7.61945e-31	0.485117	89910	UBE3B	ubiquitin protein ligase E3B
23409	8.57143e-31	0.218932	23409	SIRT4	sirtuin 4
11101	9.46686e-31	0.0455566	11101	ATE1	arginyltransferase 1
8195	1.05439e-30	0.000747826	8195	MKKS	McKusick-Kaufman syndrome
140458	1.08525e-30	1	140458	ASB5	ankyrin repeat and SOCS box containing 5
140825	1.19978e-30	0.856858	140825	NEURL2	neuralized homolog 2 (Drosophila)
60493	1.34907e-30	0.163171	60493	FASTKD5	FAST kinase domains 5
92400	1.69296e-30	0.498946	92400	RBM18	RNA binding motif protein 18
10105	1.96422e-30	0.159772	10105	PPIF	peptidylprolyl isomerase F
2805	1.9886e-30	0.00929667	2805	GOT1	glutamic-oxaloacetic transaminase 1, soluble (aspartate aminotransferase 1)
9194	2.01324e-30	0.361585	9194	SLC16A7	solute carrier family 16, member 7 (monocarboxylic acid transporter 2)
91807	2.07255e-30	0.996919	91807	MYLK3	myosin light chain kinase 3
7417	2.3276e-30	0.197481	7417	VDAC2	voltage-dependent anion channel 2
5693	2.43175e-30	3.06737e-07	5693	PSMB5	proteasome (prosome, macropain) subunit, beta type, 5
79714	2.63489e-30	0.0100022	79714	CCDC51	coiled-coil domain containing 51
9377	2.73689e-30	3.21533e-06	9377	COX5A	cytochrome c oxidase subunit Va
3316	2.79635e-30	1	3316	HSPB2	heat shock 27kDa protein 2
80755	3.33155e-30	0.000720925	80755	AARSD1	alanyl-tRNA synthetase domain containing 1
84665	3.40648e-30	0.883774	84665	MYPN	myopalladin
9868	3.71444e-30	0.210767	9868	TOMM70A	translocase of outer mitochondrial membrane 70 homolog A (S. cerevisiae)
339924	3.86104e-30	0.0391285	339924	339924
6253	4.05854e-30	0.764097	6253	RTN2	reticulon 2
7957	4.17017e-30	0.329944	7957	EPM2A	epilepsy, progressive myoclonus type 2A, Lafora disease (laforin)
55666	4.26302e-30	0.162828	55666	NPLOC4	nuclear protein localization 4 homolog (S. cerevisiae)
4617	5.23023e-30	1	4617	MYF5	myogenic factor 5
9275	6.08306e-30	0.0790462	9275	BCL7B	B-cell CLL/lymphoma 7B
84700	7.69027e-30	0.903108	84700	MYO18B	myosin XVIIIB
4259	8.05656e-30	0.954753	4259	MGST3	microsomal glutathione S-transferase 3
859	8.79451e-30	0.101245	859	CAV3	caveolin 3
91942	8.91668e-30	6.27328e-06	91942	NDUFAF2	NADH dehydrogenase (ubiquinone) complex I, assembly factor 2
4620	8.96073e-30	1	4620	MYH2	myosin, heavy chain 2, skeletal muscle, adult
7360	1.16687e-29	0.0794553	7360	UGP2	UDP-glucose pyrophosphorylase 2
7140	1.28655e-29	0.173123	7140	TNNT3	troponin T type 3 (skeletal, fast)
84934	1.31951e-29	0.25321	84934	C12orf52	chromosome 12 open reading frame 52
3983	1.33397e-29	0.201685	3983	ABLIM1	actin binding LIM protein 1
65080	1.48785e-29	0.103969	65080	MRPL44	mitochondrial ribosomal protein L44
55324	1.57414e-29	0.210568	55324	ABCF3	ATP-binding cassette, sub-family F (GCN20), member 3
7320	1.63791e-29	0.541108	7320	UBE2B	ubiquitin-conjugating enzyme E2B
9086	1.75593e-29	1	9086	EIF1AY	eukaryotic translation initiation factor 1A, Y-linked
54890	1.76982e-29	0.195947	54890	ALKBH5	alkB, alkylation repair homolog 5 (E. coli)
231	1.85598e-29	0.271259	231	AKR1B1	aldo-keto reductase family 1, member B1 (aldose reductase)
5213	1.85722e-29	0.012349	5213	PFKM	phosphofructokinase, muscle
55239	1.93498e-29	0.104881	55239	OGFOD1	2-oxoglutarate and iron-dependent oxygenase domain containing 1
339896	2.3896e-29	1	339896	GADL1	glutamate decarboxylase-like 1
4618	2.71526e-29	1	4618	MYF6	myogenic factor 6 (herculin)
284106	2.91005e-29	0.00217257	284106	CISD3	CDGSH iron sulfur domain 3
149951	3.00972e-29	0.886511	149951	COMMD7	COMM domain containing 7
29895	3.34266e-29	0.492752	29895	MYLPF	myosin light chain, phosphorylatable, fast skeletal muscle
11066	3.94339e-29	0.0318762	11066	SNRNP35	small nuclear ribonucleoprotein 35kDa (U11/U12)
5886	4.61294e-29	0.040896	5886	RAD23A	RAD23 homolog A (S. cerevisiae)
4606	4.79745e-29	0.556503	4606	MYBPC2	myosin binding protein C, fast type
4008	5.07592e-29	0.945948	4008	LMO7	LIM domain 7
284591	5.13831e-29	0.192252	284591	284591
23361	5.67102e-29	0.911521	23361	ZNF629	zinc finger protein 629
2104	6.03638e-29	0.872909	2104	ESRRG	estrogen-related receptor gamma
11149	6.48124e-29	0.914342	11149	BVES	blood vessel epicardial substance
5805	7.25961e-29	0.590432	5805	PTS	6-pyruvoyltetrahydropterin synthase
201475	7.96301e-29	0.567005	201475	RAB12	RAB12, member RAS oncogene family
91734	8.22426e-29	0.358196	91734	IDI2	isopentenyl-diphosphate delta isomerase 2
7125	8.849e-29	1	7125	TNNC2	troponin C type 2 (fast)
9131	9.09025e-29	0.000397067	9131	AIFM1	apoptosis-inducing factor, mitochondrion-associated, 1
3419	9.20028e-29	0.118278	3419	IDH3A	isocitrate dehydrogenase 3 (NAD+) alpha
55173	9.46667e-29	0.180611	55173	MRPS10	mitochondrial ribosomal protein S10
64091	1.33208e-28	1	64091	POPDC2	popeye domain containing 2
140739	1.82356e-28	0.198448	140739	UBE2F	ubiquitin-conjugating enzyme E2F (putative)
58513	1.98989e-28	0.117722	58513	EPS15L1	epidermal growth factor receptor pathway substrate 15-like 1
7704	2.01823e-28	0.479093	7704	ZBTB16	zinc finger and BTB domain containing 16
54931	2.23337e-28	0.164082	54931	TRMT10C	tRNA methyltransferase 10 homolog C (S. cerevisiae)
4604	2.30522e-28	1	4604	MYBPC1	myosin binding protein C, slow type
4835	2.33383e-28	0.00467151	4835	NQO2	NAD(P)H dehydrogenase, quinone 2
389275	2.48972e-28	0.702709	389275	389275
22849	2.83773e-28	0.17295	22849	CPEB3	cytoplasmic polyadenylation element binding protein 3
50	3.00244e-28	0.00238519	50	ACO2	aconitase 2, mitochondrial
3840	3.00387e-28	0.097575	3840	KPNA4	karyopherin alpha 4 (importin alpha 3)
84821	3.34891e-28	1	84821	84821
10500	3.61941e-28	0.984688	10500	SEMA6C	sema domain, transmembrane domain (TM), and cytoplasmic domain, (semaphorin) 6C
38	3.74846e-28	1	38	ACAT1	acetyl-CoA acetyltransferase 1
55217	4.4693e-28	0.00100233	55217	TMLHE	trimethyllysine hydroxylase, epsilon
51250	5.56278e-28	0.103869	51250	C6orf203	chromosome 6 open reading frame 203
285095	6.88627e-28	0.846319	285095	LOC285095	uncharacterized LOC285095
57132	7.23465e-28	0.168362	57132	CHMP1B	charged multivesicular body protein 1B
22921	7.3472e-28	5.71673e-07	22921	MSRB2	methionine sulfoxide reductase B2
51102	8.02739e-28	2.36878e-05	51102	MECR	mitochondrial trans-2-enoyl-CoA reductase
286	9.1015e-28	0.0153899	286	ANK1	ankyrin 1, erythrocytic
205717	9.30362e-28	0.343704	205717	KIAA2018	KIAA2018
54968	1.03056e-27	0.150982	54968	TMEM70	transmembrane protein 70
51118	1.06725e-27	0.22431	51118	UTP11L	UTP11-like, U3 small nucleolar ribonucleoprotein, (yeast)
80144	1.07801e-27	0.0304263	80144	FRAS1	Fraser syndrome 1
389203	1.11391e-27	0.0525335	389203	C4orf52	chromosome 4 open reading frame 52
3421	1.23761e-27	1.43631e-07	3421	IDH3G	isocitrate dehydrogenase 3 (NAD+) gamma
84808	1.25531e-27	0.366743	84808	C1orf170	chromosome 1 open reading frame 170
84803	1.28877e-27	0.121247	84803	AGPAT9	1-acylglycerol-3-phosphate O-acyltransferase 9
219402	1.2929e-27	0.00053174	219402	MTIF3	mitochondrial translational initiation factor 3
4619	1.45134e-27	1	4619	MYH1	myosin, heavy chain 1, skeletal muscle, adult
155370	1.46907e-27	0.371517	155370	SBDSP1	Shwachman-Bodian-Diamond syndrome pseudogene 1
84193	1.5605e-27	0.216608	84193	SETD3	SET domain containing 3
5164	1.90099e-27	0.817989	5164	PDK2	pyruvate dehydrogenase kinase, isozyme 2
245806	2.09328e-27	0.0610547	245806	VGLL2	vestigial like 2 (Drosophila)
2766	2.096e-27	0.31895	2766	GMPR	guanosine monophosphate reductase
4705	2.22342e-27	0.000798111	4705	NDUFA10	NADH dehydrogenase (ubiquinone) 1 alpha subcomplex, 10, 42kDa
23659	2.26861e-27	0.371375	23659	PLA2G15	phospholipase A2, group XV
219537	2.75404e-27	0.996919	219537	SMTNL1	smoothelin-like 1
113251	3.10721e-27	0.0628582	113251	LARP4	La ribonucleoprotein domain family, member 4
56704	3.35302e-27	0.570549	56704	JPH1	junctophilin 1
1892	3.57025e-27	1.25867e-06	1892	ECHS1	enoyl CoA hydratase, short chain, 1, mitochondrial
123624	3.57025e-27	1	123624	AGBL1	ATP/GTP binding protein-like 1
83875	3.57738e-27	0.0512713	83875	BCO2	beta-carotene oxygenase 2
2888	4.52385e-27	0.00625243	2888	GRB14	growth factor receptor-bound protein 14
55322	4.54151e-27	0.155097	55322	C5orf22	chromosome 5 open reading frame 22
6331	4.64753e-27	0.934333	6331	SCN5A	sodium channel, voltage-gated, type V, alpha subunit
6300	4.69545e-27	0.996919	6300	MAPK12	mitogen-activated protein kinase 12
10138	5.07442e-27	0.330449	10138	YAF2	YY1 associated factor 2
4695	5.10402e-27	0.235771	4695	NDUFA2	NADH dehydrogenase (ubiquinone) 1 alpha subcomplex, 2, 8kDa
10455	5.33813e-27	8.98918e-05	10455	ECI2	enoyl-CoA delta isomerase 2
8165	5.51175e-27	0.10726	8165	AKAP1	A kinase (PRKA) anchor protein 1
7136	6.26297e-27	0.975612	7136	TNNI2	troponin I type 2 (skeletal, fast)
51377	7.43922e-27	0.157302	51377	UCHL5	ubiquitin carboxyl-terminal hydrolase L5
80315	7.70817e-27	0.090348	80315	CPEB4	cytoplasmic polyadenylation element binding protein 4
5713	7.87353e-27	0.972605	5713	PSMD7	proteasome (prosome, macropain) 26S subunit, non-ATPase, 7
4622	8.07674e-27	1	4622	MYH4	myosin, heavy chain 4, skeletal muscle
10463	9.06987e-27	0.00866794	10463	SLC30A9	solute carrier family 30 (zinc transporter), member 9
92856	9.25514e-27	0.0297969	92856	IMP4	IMP4, U3 small nucleolar ribonucleoprotein, homolog (yeast)
7867	9.33e-27	0.0244373	7867	MAPKAPK3	mitogen-activated protein kinase-activated protein kinase 3
84681	1.05946e-26	0.000251099	84681	HINT2	histidine triad nucleotide binding protein 2
6329	1.07317e-26	0.696195	6329	SCN4A	sodium channel, voltage-gated, type IV, alpha subunit
55856	1.13529e-26	0.0177939	55856	ACOT13	acyl-CoA thioesterase 13
8689	1.24867e-26	0.996919	8689	KRT36	keratin 36
9373	1.3793e-26	0.252126	9373	PLAA	phospholipase A2-activating protein
51706	1.42005e-26	0.957706	51706	CYB5R1	cytochrome b5 reductase 1
53339	1.53861e-26	0.25229	53339	BTBD1	BTB (POZ) domain containing 1
51086	1.54782e-26	1	51086	TNNI3K	TNNI3 interacting kinase
8659	1.82449e-26	0.051967	8659	ALDH4A1	aldehyde dehydrogenase 4 family, member A1
1457	1.84229e-26	0.0808485	1457	CSNK2A1	casein kinase 2, alpha 1 polypeptide
131377	2.19884e-26	0.960668	131377	KBTBD5	kelch repeat and BTB (POZ) domain containing 5
56997	2.2841e-26	0.498946	56997	ADCK3	aarF domain containing kinase 3
487	2.37531e-26	0.911521	487	ATP2A1	ATPase, Ca++ transporting, cardiac muscle, fast twitch 1
27129	2.56557e-26	0.928578	27129	HSPB7	heat shock 27kDa protein family, member 7 (cardiovascular)
124454	2.73682e-26	0.0849379	124454	EARS2	glutamyl-tRNA synthetase 2, mitochondrial (putative)
11019	2.85221e-26	0.27434	11019	LIAS	lipoic acid synthetase
51256	2.98438e-26	0.718142	51256	TBC1D7	TBC1 domain family, member 7
70	3.15109e-26	0.572329	70	ACTC1	actin, alpha, cardiac muscle 1
388443	3.69407e-26	1	388443	388443
11139	5.57535e-26	0.360421	11139	11139
55827	5.81726e-26	0.105198	55827	DCAF6	DDB1 and CUL4 associated factor 6
115416	5.84793e-26	0.0191143	115416	MALSU1	mitochondrial assembly of ribosomal large subunit 1
9659	6.01334e-26	0.246136	9659	PDE4DIP	phosphodiesterase 4D interacting protein
402472	6.02268e-26	0.091802	402472	402472
51337	6.06037e-26	0.346246	51337	THEM6	thioesterase superfamily member 6
8738	6.1119e-26	1.23299e-06	8738	CRADD	CASP2 and RIPK1 domain containing adaptor with death domain
4190	6.19743e-26	0.369669	4190	MDH1	malate dehydrogenase 1, NAD (soluble)
123263	6.51933e-26	0.00468813	123263	MTFMT	mitochondrial methionyl-tRNA formyltransferase
4607	7.80322e-26	0.583124	4607	MYBPC3	myosin binding protein C, cardiac
130507	8.44264e-26	0.0817486	130507	UBR3	ubiquitin protein ligase E3 component n-recognin 3 (putative)
7164	1.05119e-25	0.189504	7164	TPD52L1	tumor protein D52-like 1
23189	1.06997e-25	0.38122	23189	KANK1	KN motif and ankyrin repeat domains 1
4331	1.16535e-25	0.120262	4331	MNAT1	menage a trois homolog 1, cyclin H assembly factor (Xenopus laevis)
1073	1.16994e-25	0.224949	1073	CFL2	cofilin 2 (muscle)
339977	1.39543e-25	1	339977	LRRC66	leucine rich repeat containing 66
85463	1.53565e-25	0.135462	85463	ZC3H12C	zinc finger CCCH-type containing 12C
5774	1.65764e-25	0.0330194	5774	PTPN3	protein tyrosine phosphatase, non-receptor type 3
23099	1.91655e-25	0.122971	23099	ZBTB43	zinc finger and BTB domain containing 43
622	2.19943e-25	0.184682	622	BDH1	3-hydroxybutyrate dehydrogenase, type 1
51534	2.36208e-25	0.0262834	51534	VTA1	Vps20-associated 1 homolog (S. cerevisiae)
152217	2.66153e-25	0.199503	152217	LOC152217	uncharacterized LOC152217
6261	4.48829e-25	1	6261	RYR1	ryanodine receptor 1 (skeletal)
51645	4.60648e-25	0.00053045	51645	PPIL1	peptidylprolyl isomerase (cyclophilin)-like 1
283737	4.6487e-25	1	283737	LOC283737	uncharacterized LOC283737
8789	5.55352e-25	0.405886	8789	FBP2	fructose-1,6-bisphosphatase 2
11102	6.05633e-25	0.0771302	11102	RPP14	ribonuclease P/MRP 14kDa subunit
211	6.23142e-25	0.460017	211	ALAS1	aminolevulinate, delta-, synthase 1
9587	7.3234e-25	0.0916543	9587	MAD2L1BP	MAD2L1 binding protein
26519	7.43136e-25	4.03953e-06	26519	TIMM10	translocase of inner mitochondrial membrane 10 homolog (yeast)
79699	8.07309e-25	0.015908	79699	ZYG11B	zyg-11 homolog B (C. elegans)
148523	8.5876e-25	0.259028	148523	C1orf51	chromosome 1 open reading frame 51
400575	8.95531e-25	0.993847	400575	400575
10469	9.03683e-25	0.179961	10469	TIMM44	translocase of inner mitochondrial membrane 44 homolog (yeast)
6832	9.58156e-25	0.2744	6832	SUPV3L1	suppressor of var1, 3-like 1 (S. cerevisiae)
5565	9.75372e-25	0.17819	5565	PRKAB2	protein kinase, AMP-activated, beta 2 non-catalytic subunit
84529	9.92614e-25	0.165234	84529	C15orf41	chromosome 15 open reading frame 41
2110	1.21316e-24	0.00842088	2110	ETFDH	electron-transferring-flavoprotein dehydrogenase
252995	1.28457e-24	0.0252394	252995	FNDC5	fibronectin type III domain containing 5
28992	1.30279e-24	0.752344	28992	MACROD1	MACRO domain containing 1
5127	1.51833e-24	0.298612	5127	CDK16	cyclin-dependent kinase 16
6821	1.58522e-24	0.117526	6821	SUOX	sulfite oxidase
85014	1.58587e-24	2.88978e-05	85014	TMEM141	transmembrane protein 141
128826	1.67804e-24	0.362553	128826	C20orf166	chromosome 20 open reading frame 166
51373	1.69407e-24	0.000413741	51373	MRPS17	mitochondrial ribosomal protein S17
55954	1.91736e-24	0.759374	55954	ZMAT5	zinc finger, matrin-type 5
36	2.58212e-24	0.000741594	36	ACADSB	acyl-CoA dehydrogenase, short/branched chain
55662	2.69904e-24	0.223374	55662	HIF1AN	hypoxia inducible factor 1, alpha subunit inhibitor
6048	2.83051e-24	1.65429e-05	6048	RNF5	ring finger protein 5, E3 ubiquitin protein ligase
4888	2.97751e-24	0.531077	4888	NPY6R	neuropeptide Y receptor Y6 (pseudogene)
27105	3.54944e-24	1	27105	27105
163688	3.74923e-24	1	163688	CALML6	calmodulin-like 6
23408	3.80434e-24	1	23408	SIRT5	sirtuin 5
144453	3.98639e-24	1	144453	BEST3	bestrophin 3
4698	4.29819e-24	0.000780656	4698	NDUFA5	NADH dehydrogenase (ubiquinone) 1 alpha subcomplex, 5, 13kDa
8226	5.25674e-24	0.0610793	8226	HDHD1	haloacid dehalogenase-like hydrolase domain containing 1
8214	8.29383e-24	0.0317358	8214	DGCR6	DiGeorge syndrome critical region gene 6
26576	1.08125e-23	0.547898	26576	SRPK3	SRSF protein kinase 3
23464	1.53927e-23	0.0410007	23464	GCAT	glycine C-acetyltransferase
7965	1.56457e-23	0.195098	7965	AIMP2	aminoacyl tRNA synthetase complex-interacting multifunctional protein 2
23788	1.63815e-23	0.000548441	23788	MTCH2	mitochondrial carrier 2
9099	1.79284e-23	0.718142	9099	USP2	ubiquitin specific peptidase 2
1375	2.04533e-23	0.945948	1375	CPT1B	carnitine palmitoyltransferase 1B (muscle)
84996	2.24981e-23	0.158703	84996	C21orf119	chromosome 21 open reading frame 119
10655	2.32316e-23	0.328908	10655	DMRT2	doublesex and mab-3 related transcription factor 2
114907	2.45471e-23	0.160876	114907	FBXO32	F-box protein 32
10486	2.51461e-23	0.0471268	10486	CAP2	CAP, adenylate cyclase-associated protein, 2 (yeast)
54205	2.52794e-23	0.0633082	54205	CYCS	cytochrome c, somatic
10699	2.6003e-23	1	10699	CORIN	corin, serine peptidase
779	2.8286e-23	0.984688	779	CACNA1S	calcium channel, voltage-dependent, L type, alpha 1S subunit
136371	2.99556e-23	0.00229842	136371	ASB10	ankyrin repeat and SOCS box containing 10
1408	3.43021e-23	0.488157	1408	CRY2	cryptochrome 2 (photolyase-like)
134147	3.54267e-23	0.214698	134147	CMBL	carboxymethylenebutenolidase homolog (Pseudomonas)
79041	3.73956e-23	0.963639	79041	TMEM38A	transmembrane protein 38A
9238	4.11581e-23	0.894772	9238	TBRG4	transforming growth factor beta regulator 4
761	4.45014e-23	0.364361	761	CA3	carbonic anhydrase III, muscle specific
3743	4.60801e-23	0.975612	3743	KCNA7	potassium voltage-gated channel, shaker-related subfamily, member 7
29035	5.08746e-23	0.0883073	29035	C16orf72	chromosome 16 open reading frame 72
782	5.14091e-23	0.00729481	782	CACNB1	calcium channel, voltage-dependent, beta 1 subunit
28227	5.59133e-23	1	28227	PPP2R3B	protein phosphatase 2, regulatory subunit B'', beta
9361	6.35364e-23	0.293514	9361	LONP1	lon peptidase 1, mitochondrial
81796	6.47368e-23	1	81796	SLCO5A1	solute carrier organic anion transporter family, member 5A1
9376	6.94555e-23	0.0745912	9376	SLC22A8	solute carrier family 22 (organic anion transporter), member 8
4285	8.19708e-23	0.000680286	4285	MIPEP	mitochondrial intermediate peptidase
5308	8.60462e-23	1	5308	PITX2	paired-like homeodomain 2
9446	9.09195e-23	0.337042	9446	GSTO1	glutathione S-transferase omega 1
2593	9.29988e-23	0.00969389	2593	GAMT	guanidinoacetate N-methyltransferase
51076	1.02385e-22	0.266788	51076	CUTC	cutC copper transporter homolog (E. coli)
23786	1.07453e-22	0.482096	23786	BCL2L13	BCL2-like 13 (apoptosis facilitator)
131920	1.19388e-22	1	131920	TMEM207	transmembrane protein 207
1774	1.20003e-22	0.149755	1774	DNASE1L1	deoxyribonuclease I-like 1
10422	1.30114e-22	0.14859	10422	UBAC1	UBA domain containing 1
10102	1.51333e-22	0.000698949	10102	TSFM	Ts translation elongation factor, mitochondrial
26873	1.89775e-22	0.870214	26873	OPLAH	5-oxoprolinase (ATP-hydrolysing)
79784	2.01054e-22	0.702709	79784	MYH14	myosin, heavy chain 14, non-muscle
122830	2.22123e-22	0.0438911	122830	NAA30	N(alpha)-acetyltransferase 30, NatC catalytic subunit
11193	2.2911e-22	0.0114556	11193	WBP4	WW domain binding protein 4 (formin binding protein 21)
55847	2.37155e-22	0.996919	55847	CISD1	CDGSH iron sulfur domain 1
134218	2.61806e-22	0.175877	134218	DNAJC21	DnaJ (Hsp40) homolog, subfamily C, member 21
341651	2.83944e-22	0.990785	341651	341651
284273	3.60626e-22	0.0653675	284273	ZADH2	zinc binding alcohol dehydrogenase domain containing 2
270	3.73188e-22	0.975612	270	AMPD1	adenosine monophosphate deaminase 1
1352	4.30153e-22	0.422753	1352	COX10	COX10 homolog, cytochrome c oxidase assembly protein, heme A: farnesyltransferase (yeast)
51119	4.32373e-22	0.612901	51119	SBDS	Shwachman-Bodian-Diamond syndrome
25813	4.48565e-22	0.0596837	25813	SAMM50	sorting and assembly machinery component 50 homolog (S. cerevisiae)
9569	5.2431e-22	0.154666	9569	GTF2IRD1	GTF2I repeat domain containing 1
8192	5.63948e-22	5.28108e-06	8192	CLPP	ClpP caseinolytic peptidase, ATP-dependent, proteolytic subunit homolog (E. coli)
28973	5.91498e-22	0.0270557	28973	MRPS18B	mitochondrial ribosomal protein S18B
5876	6.73951e-22	0.269041	5876	RABGGTB	Rab geranylgeranyltransferase, beta subunit
4710	6.74811e-22	0.996919	4710	NDUFB4	NADH dehydrogenase (ubiquinone) 1 beta subcomplex, 4, 15kDa
389125	8.5392e-22	0.963639	389125	MUSTN1	musculoskeletal, embryonic nuclear protein 1
6640	8.69169e-22	0.987732	6640	SNTA1	syntrophin, alpha 1
427	9.27505e-22	0.115459	427	ASAH1	N-acylsphingosine amidohydrolase (acid ceramidase) 1
84134	9.57851e-22	0.124305	84134	TOMM40L	translocase of outer mitochondrial membrane 40 homolog (yeast)-like
2597	1.35552e-21	0.117954	2597	GAPDH	glyceraldehyde-3-phosphate dehydrogenase
57380	1.58983e-21	0.016129	57380	MRS2	MRS2 magnesium homeostasis factor homolog (S. cerevisiae)
51503	2.13956e-21	0.0813011	51503	CWC15	CWC15 spliceosome-associated protein homolog (S. cerevisiae)
6442	2.21561e-21	0.044717	6442	SGCA	sarcoglycan, alpha (50kDa dystrophin-associated glycoprotein)
10117	2.24783e-21	0.922857	10117	ENAM	enamelin
1605	2.28027e-21	0.134176	1605	DAG1	dystroglycan 1 (dystrophin-associated glycoprotein 1)
10477	2.6503e-21	0.0586021	10477	UBE2E3	ubiquitin-conjugating enzyme E2E 3
51676	2.68162e-21	0.960668	51676	ASB2	ankyrin repeat and SOCS box containing 2
64979	2.76313e-21	0.000140092	64979	MRPL36	mitochondrial ribosomal protein L36
51128	2.8782e-21	0.326268	51128	SAR1B	SAR1 homolog B (S. cerevisiae)
221154	3.04931e-21	0.00693464	221154	EFHA1	EF-hand domain family, member A1
5701	3.06138e-21	0.0992767	5701	PSMC2	proteasome (prosome, macropain) 26S subunit, ATPase, 2
10131	3.34163e-21	0.0481513	10131	TRAP1	TNF receptor-associated protein 1
2318	3.61697e-21	0.422753	2318	FLNC	filamin C, gamma
10845	3.67105e-21	0.0467995	10845	CLPX	ClpX caseinolytic peptidase X homolog (E. coli)
10431	3.84538e-21	0.00913284	10431	10431
10884	4.27199e-21	0.14186	10884	MRPS30	mitochondrial ribosomal protein S30
283951	4.29598e-21	0.306912	283951	C16orf91	chromosome 16 open reading frame 91
253512	4.53232e-21	0.234715	253512	SLC25A30	solute carrier family 25, member 30
140809	5.62356e-21	0.0183987	140809	SRXN1	sulfiredoxin 1
389100	6.13609e-21	1	389100	389100
5116	6.99515e-21	0.957706	5116	PCNT	pericentrin
6492	7.16848e-21	0.329944	6492	SIM1	single-minded homolog 1 (Drosophila)
8239	7.60906e-21	0.147996	8239	USP9X	ubiquitin specific peptidase 9, X-linked
5188	7.71978e-21	0.000482196	5188	PET112	PET112 homolog (yeast)
6921	8.22378e-21	0.005809	6921	TCEB1	transcription elongation factor B (SIII), polypeptide 1 (15kDa, elongin C)
142685	9.27221e-21	0.993847	142685	ASB15	ankyrin repeat and SOCS box containing 15
8013	9.79988e-21	0.129545	8013	NR4A3	nuclear receptor subfamily 4, group A, member 3
2070	1.1711e-20	1	2070	EYA4	eyes absent homolog 4 (Drosophila)
6913	1.70401e-20	0.292751	6913	TBX15	T-box 15
26353	1.9483e-20	0.529424	26353	HSPB8	heat shock 22kDa protein 8
4205	2.38509e-20	0.0685217	4205	MEF2A	myocyte enhancer factor 2A
64208	2.44233e-20	0.886511	64208	POPDC3	popeye domain containing 3
79926	2.44375e-20	1	79926	79926
83547	2.77117e-20	0.220322	83547	RILP	Rab interacting lysosomal protein
339456	3.25709e-20	1	339456	TMEM52	transmembrane protein 52
56948	3.80067e-20	0.00643287	56948	SDR39U1	short chain dehydrogenase/reductase family 39U, member 1
6444	3.85189e-20	0.00135877	6444	SGCD	sarcoglycan, delta (35kDa dystrophin-associated glycoprotein)
2997	3.89965e-20	0.300722	2997	GYS1	glycogen synthase 1 (muscle)
55245	4.04099e-20	0.00261057	55245	UQCC	ubiquinol-cytochrome c reductase complex chaperone
2660	4.28055e-20	1	2660	MSTN	myostatin
9927	4.74686e-20	0.768848	9927	MFN2	mitofusin 2
10425	5.44819e-20	0.229264	10425	ARIH2	ariadne homolog 2 (Drosophila)
10101	5.80051e-20	0.0213214	10101	NUBP2	nucleotide binding protein 2
116085	6.04081e-20	0.632264	116085	SLC22A12	solute carrier family 22 (organic anion/urate transporter), member 12
55052	6.40802e-20	0.628344	55052	MRPL20	mitochondrial ribosomal protein L20
157378	8.54267e-20	0.154879	157378	TMEM65	transmembrane protein 65
10402	9.80143e-20	0.149545	10402	ST3GAL6	ST3 beta-galactoside alpha-2,3-sialyltransferase 6
2103	9.90289e-20	0.838498	2103	ESRRB	estrogen-related receptor beta
1212	1.01367e-19	0.000688307	1212	CLTB	clathrin, light chain B
388115	1.03552e-19	0.142894	388115	C15orf52	chromosome 15 open reading frame 52
255275	1.28012e-19	0.996919	255275	MYADML2	myeloid-associated differentiation marker-like 2
29803	1.30638e-19	0.612901	29803	REPIN1	replication initiator 1
4291	1.41617e-19	0.996919	4291	MLF1	myeloid leukemia factor 1
92609	1.66866e-19	0.00943492	92609	TIMM50	translocase of inner mitochondrial membrane 50 homolog (S. cerevisiae)
79594	1.77592e-19	0.0890411	79594	MUL1	mitochondrial E3 ubiquitin protein ligase 1
2275	1.78852e-19	1	2275	FHL3	four and a half LIM domains 3
85366	1.78978e-19	0.175338	85366	MYLK2	myosin light chain kinase 2
51181	1.81755e-19	0.0265352	51181	DCXR	dicarbonyl/L-xylulose reductase
51371	1.98139e-19	0.000244719	51371	POMP	proteasome maturation protein
283071	1.99282e-19	1	283071	283071
124995	1.99453e-19	0.122931	124995	MRPL10	mitochondrial ribosomal protein L10
57704	2.16498e-19	0.0371391	57704	GBA2	glucosidase, beta (bile acid) 2
2016	2.26267e-19	0.945948	2016	EMX1	empty spiracles homeobox 1
118490	2.47934e-19	1	118490	MSS51	MSS51 mitochondrial translational activator homolog (S. cerevisiae)
26251	2.61702e-19	0.477598	26251	KCNG2	potassium voltage-gated channel, subfamily G, member 2
5569	2.7815e-19	0.984688	5569	PKIA	protein kinase (cAMP-dependent, catalytic) inhibitor alpha
8892	2.81604e-19	0.0306917	8892	EIF2B2	eukaryotic translation initiation factor 2B, subunit 2 beta, 39kDa
10494	2.94111e-19	0.36721	10494	STK25	serine/threonine kinase 25
84925	3.02964e-19	0.0293498	84925	DIRC2	disrupted in renal carcinoma 2
64795	3.30867e-19	0.00959796	64795	RMND5A	required for meiotic nuclear division 5 homolog A (S. cerevisiae)
196410	3.30867e-19	0.24767	196410	METTL7B	methyltransferase like 7B
573	3.49225e-19	0.18859	573	BAG1	BCL2-associated athanogene
51332	3.49741e-19	0.174227	51332	SPTBN5	spectrin, beta, non-erythrocytic 5
81786	3.70815e-19	0.987732	81786	TRIM7	tripartite motif containing 7
6517	4.1126e-19	1	6517	SLC2A4	solute carrier family 2 (facilitated glucose transporter), member 4
28	4.41834e-19	0.886511	28	ABO	ABO blood group (transferase A, alpha 1-3-N-acetylgalactosaminyltransferase; transferase B, alpha 1-3-galactosyltransferase)
10043	4.84226e-19	0.157089	10043	TOM1	target of myb1 (chicken)
7352	4.84226e-19	0.750015	7352	UCP3	uncoupling protein 3 (mitochondrial, proton carrier)
137492	4.95891e-19	0.27275	137492	VPS37A	vacuolar protein sorting 37 homolog A (S. cerevisiae)
7436	5.05344e-19	0.324796	7436	VLDLR	very low density lipoprotein receptor
91647	5.12151e-19	0.125443	91647	ATPAF2	ATP synthase mitochondrial F1 complex assembly factor 2
55222	5.24543e-19	0.229849	55222	LRRC20	leucine rich repeat containing 20
5718	5.30609e-19	0.0938201	5718	PSMD12	proteasome (prosome, macropain) 26S subunit, non-ATPase, 12
2739	5.51243e-19	0.144033	2739	GLO1	glyoxalase I
80145	5.55924e-19	0.00097876	80145	THOC7	THO complex 7 homolog (Drosophila)
7111	6.2551e-19	0.733908	7111	TMOD1	tropomodulin 1
55760	7.58444e-19	0.470194	55760	DHX32	DEAH (Asp-Glu-Ala-His) box polypeptide 32
1143	7.71504e-19	1	1143	CHRNB4	cholinergic receptor, nicotinic, beta 4 (neuronal)
11112	8.59745e-19	0.0113185	11112	HIBADH	3-hydroxyisobutyrate dehydrogenase
4515	1.02161e-18	0.0587253	4515	MTCP1	mature T-cell proliferation 1
29083	1.04259e-18	0.099032	29083	GTPBP8	GTP-binding protein 8 (putative)
6523	1.07375e-18	0.434832	6523	SLC5A1	solute carrier family 5 (sodium/glucose cotransporter), member 1
2157	1.34291e-18	0.0125503	2157	F8	coagulation factor VIII, procoagulant component
6249	1.34687e-18	0.0989969	6249	CLIP1	CAP-GLY domain containing linker protein 1
388272	1.35126e-18	0.139435	388272	C16orf87	chromosome 16 open reading frame 87
10579	1.39105e-18	0.392131	10579	TACC2	transforming, acidic coiled-coil containing protein 2
3694	1.49058e-18	0.0322931	3694	ITGB6	integrin, beta 6
817	1.49926e-18	0.0785386	817	CAMK2D	calcium/calmodulin-dependent protein kinase II delta
5862	1.5122e-18	0.859513	5862	RAB2A	RAB2A, member RAS oncogene family
5709	1.60798e-18	0.369883	5709	PSMD3	proteasome (prosome, macropain) 26S subunit, non-ATPase, 3
64978	1.8747e-18	0.170912	64978	MRPL38	mitochondrial ribosomal protein L38
7172	2.24141e-18	1.71832e-06	7172	TPMT	thiopurine S-methyltransferase
10133	2.24256e-18	0.349146	10133	OPTN	optineurin
664	2.25474e-18	0.683344	664	BNIP3	BCL2/adenovirus E1B 19kDa interacting protein 3
51422	2.3031e-18	0.52123	51422	PRKAG2	protein kinase, AMP-activated, gamma 2 non-catalytic subunit
64960	2.60399e-18	0.0143181	64960	MRPS15	mitochondrial ribosomal protein S15
124751	2.71437e-18	0.911521	124751	KRBA2	KRAB-A domain containing 2
25847	2.76838e-18	0.0391173	25847	ANAPC13	anaphase promoting complex subunit 13
5913	2.96444e-18	1	5913	RAPSN	receptor-associated protein of the synapse
353116	3.14296e-18	0.485117	353116	RILPL1	Rab interacting lysosomal protein-like 1
1410	3.2403e-18	0.290351	1410	CRYAB	crystallin, alpha B
153346	3.48775e-18	0.0670555	153346	153346
400744	3.60678e-18	0.960668	400744	400744
5571	4.29988e-18	0.00294344	5571	PRKAG1	protein kinase, AMP-activated, gamma 1 non-catalytic subunit
8505	4.56534e-18	0.204115	8505	PARG	poly (ADP-ribose) glycohydrolase
57291	4.70343e-18	0.0144942	57291	DANCR	differentiation antagonizing non-protein coding RNA
51218	4.78741e-18	0.294627	51218	GLRX5	glutaredoxin 5
5717	5.04271e-18	0.547898	5717	PSMD11	proteasome (prosome, macropain) 26S subunit, non-ATPase, 11
400618	5.07607e-18	1	400618	FLJ37644	uncharacterized LOC400618
1632	5.52469e-18	0.00362353	1632	ECI1	enoyl-CoA delta isomerase 1
35	5.7614e-18	0.000716844	35	ACADS	acyl-CoA dehydrogenase, C-2 to C-3 short chain
4902	6.05159e-18	0.296463	4902	NRTN	neurturin
166	6.06829e-18	0.000219426	166	AES	amino-terminal enhancer of split
284825	6.24865e-18	1	284825	LOC284825	uncharacterized LOC284825
192286	6.47372e-18	0.0034685	192286	HIGD2A	HIG1 hypoxia inducible domain family, member 2A
91368	6.70227e-18	0.27462	91368	CDKN2AIPNL	CDKN2A interacting protein N-terminal like
27246	6.77194e-18	0.353865	27246	RNF115	ring finger protein 115
5515	6.77419e-18	0.854211	5515	PPP2CA	protein phosphatase 2, catalytic subunit, alpha isozyme
51207	6.86236e-18	0.963639	51207	DUSP13	dual specificity phosphatase 13
55229	8.029e-18	0.0630618	55229	PANK4	pantothenate kinase 4
113655	8.12129e-18	0.239074	113655	MFSD3	major facilitator superfamily domain containing 3
23034	8.71745e-18	0.574114	23034	SAMD4A	sterile alpha motif domain containing 4A
116449	8.95496e-18	0.957706	116449	CLNK	cytokine-dependent hematopoietic cell linker
27034	9.80241e-18	0.0152532	27034	ACAD8	acyl-CoA dehydrogenase family, member 8
58515	1.02104e-17	0.025526	58515	SELK	selenoprotein K
89	1.12083e-17	0.498946	89	ACTN3	actinin, alpha 3
6183	1.17388e-17	0.0280114	6183	MRPS12	mitochondrial ribosomal protein S12
4771	1.21215e-17	0.145006	4771	NF2	neurofibromin 2 (merlin)
327	1.24238e-17	0.00414835	327	APEH	N-acylaminoacyl-peptide hydrolase
3758	1.43913e-17	0.189827	3758	KCNJ1	potassium inwardly-rectifying channel, subfamily J, member 1
5260	2.27197e-17	0.445854	5260	PHKG1	phosphorylase kinase, gamma 1 (muscle)
1327	2.50019e-17	0.0405069	1327	COX4I1	cytochrome c oxidase subunit IV isoform 1
57224	2.90361e-17	0.228595	57224	NHSL1	NHS-like 1
92305	2.91173e-17	4.2759e-05	92305	TMEM129	transmembrane protein 129
83999	3.29015e-17	0.940123	83999	KREMEN1	kringle containing transmembrane protein 1
388531	3.29725e-17	1	388531	RGS9BP	regulator of G protein signaling 9 binding protein
23463	3.69934e-17	0.172282	23463	ICMT	isoprenylcysteine carboxyl methyltransferase
142689	3.78113e-17	0.975612	142689	ASB12	ankyrin repeat and SOCS box containing 12
64328	3.88675e-17	0.00714945	64328	XPO4	exportin 4
549	3.89961e-17	0.354991	549	AUH	AU RNA binding protein/enoyl-CoA hydratase
5710	4.21734e-17	0.0016268	5710	PSMD4	proteasome (prosome, macropain) 26S subunit, non-ATPase, 4
1756	4.38523e-17	0.0940061	1756	DMD	dystrophin
29928	4.43056e-17	0.228019	29928	TIMM22	translocase of inner mitochondrial membrane 22 homolog (yeast)
121952	6.74636e-17	1	121952	METTL21CP1	methyltransferase like 21C pseudogene 1
91137	6.82485e-17	0.17461	91137	SLC25A46	solute carrier family 25, member 46
9333	6.98468e-17	0.283669	9333	TGM5	transglutaminase 5
284184	7.17296e-17	0.0102791	284184	C17orf89	chromosome 17 open reading frame 89
80772	8.56796e-17	0.263328	80772	GLTPD1	glycolipid transfer protein domain containing 1
221545	8.62877e-17	0.221002	221545	C6orf136	chromosome 6 open reading frame 136
80852	9.89614e-17	0.204193	80852	GRIP2	glutamate receptor interacting protein 2
29103	1.00981e-16	0.0458866	29103	DNAJC15	DnaJ (Hsp40) homolog, subfamily C, member 15
79109	1.06275e-16	0.109099	79109	MAPKAP1	mitogen-activated protein kinase associated protein 1
1678	1.12584e-16	0.0722666	1678	TIMM8A	translocase of inner mitochondrial membrane 8 homolog A (yeast)
5714	1.13292e-16	6.81755e-05	5714	PSMD8	proteasome (prosome, macropain) 26S subunit, non-ATPase, 8
10904	1.13292e-16	0.180775	10904	BLCAP	bladder cancer associated protein
59338	1.18637e-16	0.168608	59338	PLEKHA1	pleckstrin homology domain containing, family A (phosphoinositide binding specific) member 1
1384	1.43944e-16	0.297737	1384	CRAT	carnitine O-acetyltransferase
339400	1.53029e-16	1	339400	FLG-AS1	FLG antisense RNA 1
28969	1.75489e-16	0.0293996	28969	BZW2	basic leucine zipper and W2 domains 2
6910	1.84621e-16	0.978628	6910	TBX5	T-box 5
11334	1.85458e-16	0.0139994	11334	TUSC2	tumor suppressor candidate 2
389332	1.90816e-16	0.660388	389332	LOC389332	uncharacterized LOC389332
5481	2.14767e-16	0.263498	5481	PPID	peptidylprolyl isomerase D
51042	2.36878e-16	0.00705176	51042	ZNF593	zinc finger protein 593
23139	2.51282e-16	0.270563	23139	MAST2	microtubule associated serine/threonine kinase 2
282618	2.5673e-16	0.33307	282618	IL29	interleukin 29 (interferon, lambda 1)
3890	2.71785e-16	0.914342	3890	KRT84	keratin 84
10237	2.94353e-16	0.000847843	10237	SLC35B1	solute carrier family 35, member B1
114294	3.12666e-16	0.445854	114294	LACTB	lactamase, beta
2817	3.12867e-16	0.59783	2817	GPC1	glypican 1
830	3.15723e-16	0.0022021	830	CAPZA2	capping protein (actin filament) muscle Z-line, alpha 2
10539	3.188e-16	0.987732	10539	GLRX3	glutaredoxin 3
91977	3.32056e-16	0.000530825	91977	MYOZ3	myozenin 3
53632	4.0674e-16	0.922857	53632	PRKAG3	protein kinase, AMP-activated, gamma 3 non-catalytic subunit
54841	4.1826e-16	0.150147	54841	BIVM	basic, immunoglobulin-like variable motif containing
205	4.35845e-16	0.165084	205	AK4	adenylate kinase 4
54463	4.36792e-16	0.271944	54463	FAM134B	family with sequence similarity 134, member B
5019	4.45495e-16	0.556503	5019	OXCT1	3-oxoacid CoA transferase 1
56894	4.53266e-16	0.155818	56894	AGPAT3	1-acylglycerol-3-phosphate O-acyltransferase 3
1014	4.5354e-16	0.154386	1014	CDH16	cadherin 16, KSP-cadherin
286101	5.52759e-16	0.151701	286101	ZNF252P	zinc finger protein 252, pseudogene
84706	5.60739e-16	0.922857	84706	GPT2	glutamic pyruvate transaminase (alanine aminotransferase) 2
133522	5.74108e-16	0.244562	133522	PPARGC1B	peroxisome proliferator-activated receptor gamma, coactivator 1 beta
10240	5.94208e-16	0.0507836	10240	MRPS31	mitochondrial ribosomal protein S31
27235	6.45249e-16	0.00111591	27235	COQ2	coenzyme Q2 homolog, prenyltransferase (yeast)
11344	7.12225e-16	0.162066	11344	TWF2	twinfilin, actin-binding protein, homolog 2 (Drosophila)
6271	7.278e-16	0.768848	6271	S100A1	S100 calcium binding protein A1
54978	7.67708e-16	0.292234	54978	C2orf18	chromosome 2 open reading frame 18
1891	7.96296e-16	0.864847	1891	ECH1	enoyl CoA hydratase 1, peroxisomal
51529	7.99618e-16	0.68974	51529	ANAPC11	anaphase promoting complex subunit 11
27349	8.65109e-16	0.000521557	27349	MCAT	malonyl CoA:ACP acyltransferase (mitochondrial)
51001	8.70351e-16	0.241881	51001	MTERFD1	MTERF domain containing 1
55853	9.27452e-16	1	55853	IDI2-AS1	IDI2 antisense RNA 1
786	1.00439e-15	0.963639	786	CACNG1	calcium channel, voltage-dependent, gamma subunit 1
5708	1.03176e-15	0.328941	5708	PSMD2	proteasome (prosome, macropain) 26S subunit, non-ATPase, 2
8225	1.06049e-15	0.355817	8225	GTPBP6	GTP binding protein 6 (putative)
3029	1.19022e-15	8.69013e-07	3029	HAGH	hydroxyacylglutathione hydrolase
54948	1.33587e-15	0.000861174	54948	MRPL16	mitochondrial ribosomal protein L16
25824	1.37376e-15	7.60439e-06	25824	PRDX5	peroxiredoxin 5
23381	1.4023e-15	0.251269	23381	SMG5	smg-5 homolog, nonsense mediated mRNA decay factor (C. elegans)
7060	1.44766e-15	0.931451	7060	THBS4	thrombospondin 4
283284	1.88287e-15	1	283284	IGSF22	immunoglobulin superfamily, member 22
79568	1.93147e-15	0.00275404	79568	C2orf47	chromosome 2 open reading frame 47
54942	2.21528e-15	0.210767	54942	FAM206A	family with sequence similarity 206, member A
9069	2.24012e-15	0.170232	9069	CLDN12	claudin 12
11346	2.32169e-15	0.152835	11346	SYNPO	synaptopodin
4501	2.38628e-15	0.244154	4501	MT1X	metallothionein 1X
55902	2.41494e-15	0.119214	55902	ACSS2	acyl-CoA synthetase short-chain family member 2
84304	2.74374e-15	0.934333	84304	NUDT22	nudix (nucleoside diphosphate linked moiety X)-type motif 22
25874	2.99084e-15	3.58128e-05	25874	MPC2	mitochondrial pyruvate carrier 2
8412	3.10686e-15	0.252126	8412	BCAR3	breast cancer anti-estrogen resistance 3
6009	3.13373e-15	0.229308	6009	RHEB	Ras homolog enriched in brain
222070	3.27103e-15	0.664505	222070	222070
196294	3.50972e-15	0.0866587	196294	IMMP1L	IMP1 inner mitochondrial membrane peptidase-like (S. cerevisiae)
51022	4.0428e-15	0.240533	51022	GLRX2	glutaredoxin 2
57158	4.35647e-15	0.0606609	57158	JPH2	junctophilin 2
79814	4.36472e-15	3.29182e-07	79814	AGMAT	agmatine ureohydrolase (agmatinase)
51138	4.71316e-15	0.000944256	51138	COPS4	COP9 constitutive photomorphogenic homolog subunit 4 (Arabidopsis)
5315	4.80951e-15	0.233862	5315	PKM	pyruvate kinase, muscle
27179	4.94144e-15	0.903108	27179	IL36A	interleukin 36, alpha
124801	5.5325e-15	0.111412	124801	LSM12	LSM12 homolog (S. cerevisiae)
3211	5.55583e-15	0.0934381	3211	HOXB1	homeobox B1
93408	5.80416e-15	0.590432	93408	MYL10	myosin, light chain 10, regulatory
10560	6.30378e-15	0.0411149	10560	SLC19A2	solute carrier family 19 (thiamine transporter), member 2
6887	7.78834e-15	0.175338	6887	TAL2	T-cell acute lymphocytic leukemia 2
1188	7.8907e-15	0.092542	1188	CLCNKB	chloride channel, voltage-sensitive Kb
134265	8.15947e-15	0.65426	134265	AFAP1L1	actin filament associated protein 1-like 1
285813	8.44684e-15	0.975612	285813	285813
3321	8.81745e-15	0.226688	3321	IGSF3	immunoglobulin superfamily, member 3
63891	8.95346e-15	0.289666	63891	RNF123	ring finger protein 123
10295	1.00621e-14	0.0725158	10295	BCKDK	branched chain ketoacid dehydrogenase kinase
7003	1.04898e-14	0.178347	7003	TEAD1	TEA domain family member 1 (SV40 transcriptional enhancer factor)
94107	1.06268e-14	0.211379	94107	TMEM203	transmembrane protein 203
79724	1.18181e-14	0.375287	79724	ZNF768	zinc finger protein 768
10063	1.2051e-14	0.130486	10063	COX17	COX17 cytochrome c oxidase assembly homolog (S. cerevisiae)
286167	1.28001e-14	0.0212718	286167	286167
54985	1.28483e-14	0.265309	54985	HCFC1R1	host cell factor C1 regulator 1 (XPO1 dependent)
80775	1.28616e-14	0.102879	80775	TMEM177	transmembrane protein 177
57226	1.32267e-14	0.181441	57226	LYRM2	LYR motif containing 2
90135	1.40338e-14	0.146874	90135	BTBD6	BTB (POZ) domain containing 6
57157	1.41094e-14	0.0481523	57157	PHTF2	putative homeodomain transcription factor 2
91689	1.4316e-14	0.972605	91689	C22orf32	chromosome 22 open reading frame 32
95	1.6818e-14	4.30036e-06	95	ACY1	aminoacylase 1
11333	1.70025e-14	0.332683	11333	PDAP1	PDGFA associated protein 1
25994	1.75432e-14	0.0258369	25994	HIGD1A	HIG1 hypoxia inducible domain family, member 1A
11163	1.8107e-14	0.0661772	11163	NUDT4	nudix (nucleoside diphosphate linked moiety X)-type motif 4
10965	1.82917e-14	0.334119	10965	ACOT2	acyl-CoA thioesterase 2
87769	2.05399e-14	0.872909	87769	A2LD1	AIG2-like domain 1
51491	2.10219e-14	0.229629	51491	NOP16	NOP16 nucleolar protein homolog (yeast)
54414	2.29363e-14	0.00166227	54414	SIAE	sialic acid acetylesterase
55258	2.43031e-14	0.283654	55258	THNSL2	threonine synthase-like 2 (S. cerevisiae)
27109	2.58655e-14	0.0355049	27109	ATP5S	ATP synthase, H+ transporting, mitochondrial Fo complex, subunit s (factor B)
345757	2.60291e-14	0.0693771	345757	FAM174A	family with sequence similarity 174, member A
9921	2.81676e-14	0.140755	9921	RNF10	ring finger protein 10
147339	2.98237e-14	0.143842	147339	C18orf25	chromosome 18 open reading frame 25
128486	3.09201e-14	0.937223	128486	FITM2	fat storage-inducing transmembrane protein 2
23203	3.17928e-14	0.00348748	23203	PMPCA	peptidase (mitochondrial processing) alpha
374655	3.18154e-14	0.990785	374655	ZNF710	zinc finger protein 710
1622	3.20623e-14	0.000681873	1622	DBI	diazepam binding inhibitor (GABA receptor modulator, acyl-CoA binding protein)
64097	3.39643e-14	0.922857	64097	EPB41L4A	erythrocyte membrane protein band 4.1 like 4A
5605	3.4282e-14	0.0696546	5605	MAP2K2	mitogen-activated protein kinase kinase 2
10311	3.73415e-14	0.0755593	10311	DSCR3	Down syndrome critical region gene 3
988	3.83623e-14	0.568774	988	CDC5L	CDC5 cell division cycle 5-like (S. pombe)
28989	4.28023e-14	0.000330829	28989	NTMT1	N-terminal Xaa-Pro-Lys N-methyltransferase 1
2821	4.35573e-14	0.996919	2821	GPI	glucose-6-phosphate isomerase
4909	4.47583e-14	0.788146	4909	NTF4	neurotrophin 4
23230	4.60209e-14	0.0813323	23230	VPS13A	vacuolar protein sorting 13 homolog A (S. cerevisiae)
7268	4.7605e-14	0.230258	7268	TTC4	tetratricopeptide repeat domain 4
7812	4.84741e-14	0.0778646	7812	CSDE1	cold shock domain containing E1, RNA-binding
10273	5.19795e-14	0.0410989	10273	STUB1	STIP1 homology and U-box containing protein 1, E3 ubiquitin protein ligase
64111	5.48118e-14	1	64111	NPVF	neuropeptide VF precursor
2691	5.50497e-14	0.978628	2691	GHRH	growth hormone releasing hormone
23433	5.81997e-14	0.0992925	23433	RHOQ	ras homolog family member Q
2767	6.1933e-14	0.285802	2767	GNA11	guanine nucleotide binding protein (G protein), alpha 11 (Gq class)
5700	6.50672e-14	0.340479	5700	PSMC1	proteasome (prosome, macropain) 26S subunit, ATPase, 1
572	6.62113e-14	8.73688e-07	572	BAD	BCL2-associated agonist of cell death
55256	7.15366e-14	0.213151	55256	ADI1	acireductone dioxygenase 1
286071	7.26586e-14	0.990785	286071	LOC286071	uncharacterized LOC286071
2639	7.3962e-14	0.000508035	2639	GCDH	glutaryl-CoA dehydrogenase
144363	7.7081e-14	0.000333326	144363	LYRM5	LYR motif containing 5
84948	7.7673e-14	0.14855	84948	TIGD5	tigger transposable element derived 5
6566	7.7673e-14	0.293514	6566	SLC16A1	solute carrier family 16, member 1 (monocarboxylic acid transporter 1)
29094	8.78434e-14	0.0961781	29094	LGALSL	lectin, galactoside-binding-like
6236	1.04186e-13	0.709283	6236	RRAD	Ras-related associated with diabetes
57001	1.08316e-13	0.00461308	57001	ACN9	ACN9 homolog (S. cerevisiae)
81554	1.09322e-13	0.200991	81554	WBSCR16	Williams-Beuren syndrome chromosome region 16
23172	1.12196e-13	0.0227943	23172	FAM175B	family with sequence similarity 175, member B
64839	1.14345e-13	0.616726	64839	FBXL17	F-box and leucine-rich repeat protein 17
149448	1.18171e-13	0.188544	149448	149448
1760	1.18171e-13	0.934333	1760	DMPK	dystrophia myotonica-protein kinase
392838	1.18291e-13	0.00233877	392838	392838
65018	1.2788e-13	0.357265	65018	PINK1	PTEN induced putative kinase 1
7170	1.28557e-13	0.345914	7170	TPM3	tropomyosin 3
7004	1.44263e-13	0.350934	7004	TEAD4	TEA domain family member 4
55591	1.49868e-13	0.139054	55591	VEZT	vezatin, adherens junctions transmembrane protein
63941	1.54182e-13	0.960668	63941	NECAB3	N-terminal EF-hand calcium binding protein 3
51382	1.71899e-13	0.079478	51382	ATP6V1D	ATPase, H+ transporting, lysosomal 34kDa, V1 subunit D
9421	1.87098e-13	0.162972	9421	HAND1	heart and neural crest derivatives expressed 1
10229	1.92207e-13	0.250466	10229	COQ7	coenzyme Q7 homolog, ubiquinone (yeast)
9220	2.05367e-13	0.388461	9220	TIAF1	TGFB1-induced anti-apoptotic factor 1
51573	2.07914e-13	0.0780341	51573	GDE1	glycerophosphodiester phosphodiesterase 1
10197	2.23898e-13	0.167899	10197	PSME3	proteasome (prosome, macropain) activator subunit 3 (PA28 gamma; Ki)
10445	2.24133e-13	0.154108	10445	MCRS1	microspherule protein 1
50617	2.32547e-13	1	50617	ATP6V0A4	ATPase, H+ transporting, lysosomal V0 subunit a4
7376	2.38997e-13	0.262464	7376	NR1H2	nuclear receptor subfamily 1, group H, member 2
115098	2.41302e-13	0.0010702	115098	CCDC124	coiled-coil domain containing 124
5166	2.50672e-13	0.40083	5166	PDK4	pyruvate dehydrogenase kinase, isozyme 4
27335	3.06689e-13	9.74806e-06	27335	EIF3K	eukaryotic translation initiation factor 3, subunit K
80222	3.12537e-13	0.0133542	80222	TARS2	threonyl-tRNA synthetase 2, mitochondrial (putative)
84335	3.31759e-13	0.575905	84335	AKT1S1	AKT1 substrate 1 (proline-rich)
9200	3.3714e-13	0.0316	9200	PTPLA	protein tyrosine phosphatase-like (proline instead of catalytic arginine), member A
84769	3.3783e-13	0.283654	84769	MPV17L2	MPV17 mitochondrial membrane protein-like 2
4330	3.59823e-13	0.253664	4330	MN1	meningioma (disrupted in balanced translocation) 1
196541	3.66809e-13	1	196541	METTL21C	methyltransferase like 21C
11080	3.836e-13	0.167705	11080	DNAJB4	DnaJ (Hsp40) homolog, subfamily B, member 4
9455	3.85706e-13	0.331197	9455	HOMER2	homer homolog 2 (Drosophila)
3033	3.99933e-13	0.0481513	3033	HADH	hydroxyacyl-CoA dehydrogenase
116224	4.01944e-13	0.27275	116224	FAM122A	family with sequence similarity 122A
9282	4.08049e-13	0.157866	9282	MED14	mediator complex subunit 14
23590	4.83892e-13	0.00570529	23590	PDSS1	prenyl (decaprenyl) diphosphate synthase, subunit 1
9352	4.84195e-13	0.984688	9352	TXNL1	thioredoxin-like 1
286006	5.00223e-13	0.112901	286006	C7orf53	chromosome 7 open reading frame 53
3933	5.10211e-13	1	3933	LCN1	lipocalin 1
846	6.55599e-13	0.11399	846	CASR	calcium-sensing receptor
64771	7.53642e-13	0.0098577	64771	C6orf106	chromosome 6 open reading frame 106
8291	7.56344e-13	0.276609	8291	DYSF	dysferlin, limb girdle muscular dystrophy 2B (autosomal recessive)
4524	7.83641e-13	0.0843034	4524	MTHFR	methylenetetrahydrofolate reductase (NAD(P)H)
11343	7.84508e-13	0.138984	11343	MGLL	monoglyceride lipase
10611	7.90385e-13	0.275789	10611	PDLIM5	PDZ and LIM domain 5
64949	7.90815e-13	0.000280991	64949	MRPS26	mitochondrial ribosomal protein S26
5191	8.65878e-13	0.00260674	5191	PEX7	peroxisomal biogenesis factor 7
1573	8.79235e-13	0.013091	1573	CYP2J2	cytochrome P450, family 2, subfamily J, polypeptide 2
27257	8.9437e-13	0.0420118	27257	LSM1	LSM1 homolog, U6 small nuclear RNA associated (S. cerevisiae)
27440	9.04802e-13	0.032921	27440	CECR5	cat eye syndrome chromosome region, candidate 5
25880	9.63926e-13	0.226663	25880	TMEM186	transmembrane protein 186
7827	9.94185e-13	0.33307	7827	NPHS2	nephrosis 2, idiopathic, steroid-resistant (podocin)
56910	1.03269e-12	0.221506	56910	STARD7	StAR-related lipid transfer (START) domain containing 7
10994	1.09035e-12	0.314721	10994	ILVBL	ilvB (bacterial acetolactate synthase)-like
51537	1.14632e-12	0.0392755	51537	MTFP1	mitochondrial fission process 1
5588	1.21982e-12	0.015441	5588	PRKCQ	protein kinase C, theta
2528	1.2554e-12	0.109693	2528	FUT6	fucosyltransferase 6 (alpha (1,3) fucosyltransferase)
55163	1.25967e-12	0.000167363	55163	PNPO	pyridoxamine 5'-phosphate oxidase
50484	1.35627e-12	0.0330252	50484	RRM2B	ribonucleotide reductase M2 B (TP53 inducible)
2067	1.3859e-12	0.544492	2067	ERCC1	excision repair cross-complementing rodent repair deficiency, complementation group 1 (includes overlapping antisense sequence)
113220	1.436e-12	0.911521	113220	KIF12	kinesin family member 12
4608	1.46491e-12	0.867526	4608	MYBPH	myosin binding protein H
94239	1.47071e-12	0.0182551	94239	H2AFV	H2A histone family, member V
79623	1.47346e-12	0.470194	79623	GALNT14	UDP-N-acetyl-alpha-D-galactosamine:polypeptide N-acetylgalactosaminyltransferase 14 (GalNAc-T14)
2948	1.62933e-12	0.0433326	2948	GSTM4	glutathione S-transferase mu 4
4718	1.75234e-12	0.000883634	4718	NDUFC2	NADH dehydrogenase (ubiquinone) 1, subcomplex unknown, 2, 14.5kDa
59285	1.75378e-12	0.00417819	59285	CACNG6	calcium channel, voltage-dependent, gamma subunit 6
687	1.77863e-12	0.0821605	687	KLF9	Kruppel-like factor 9
8775	1.90018e-12	0.312763	8775	NAPA	N-ethylmaleimide-sensitive factor attachment protein, alpha
353322	1.99914e-12	0.68974	353322	ANKRD37	ankyrin repeat domain 37
6524	2.08879e-12	0.0211321	6524	SLC5A2	solute carrier family 5 (sodium/glucose cotransporter), member 2
5052	2.27505e-12	0.833324	5052	PRDX1	peroxiredoxin 1
57110	2.39985e-12	1	57110	HRASLS	HRAS-like suppressor
6392	2.50017e-12	5.46207e-06	6392	SDHD	succinate dehydrogenase complex, subunit D, integral membrane protein
5201	2.6266e-12	0.508379	5201	PFDN1	prefoldin subunit 1
217	2.68067e-12	0.143816	217	ALDH2	aldehyde dehydrogenase 2 family (mitochondrial)
51116	2.71891e-12	0.194759	51116	MRPS2	mitochondrial ribosomal protein S2
404093	2.81515e-12	0.89201	404093	CUEDC1	CUE domain containing 1
997	2.9758e-12	0.0818238	997	CDC34	cell division cycle 34 homolog (S. cerevisiae)
4338	3.06544e-12	0.015421	4338	MOCS2	molybdenum cofactor synthesis 2
169693	3.09665e-12	0.883774	169693	TMEM252	transmembrane protein 252
9882	3.2073e-12	0.047815	9882	TBC1D4	TBC1 domain family, member 4
23276	3.31172e-12	0.393363	23276	KLHL18	kelch-like 18 (Drosophila)
81853	3.38799e-12	0.0955217	81853	TMEM14B	transmembrane protein 14B
256306	3.47868e-12	0.103544	256306	256306
51728	3.55711e-12	0.248931	51728	POLR3K	polymerase (RNA) III (DNA directed) polypeptide K, 12.3 kDa
23095	3.84432e-12	0.063584	23095	KIF1B	kinesin family member 1B
3836	3.95322e-12	0.166066	3836	KPNA1	karyopherin alpha 1 (importin alpha 5)
84272	3.98054e-12	0.018811	84272	YIPF4	Yip1 domain family, member 4
10497	4.30421e-12	0.451467	10497	UNC13B	unc-13 homolog B (C. elegans)
389293	4.33623e-12	0.340479	389293	ISCA1P1	iron-sulfur cluster assembly 1 homolog (S. cerevisiae) pseudogene 1
10328	4.38939e-12	0.270201	10328	EMC8	ER membrane protein complex subunit 8
285943	4.55011e-12	1	285943	HOXA-AS2	HOXA cluster antisense RNA 2
3297	4.72389e-12	0.341551	3297	HSF1	heat shock transcription factor 1
5818	4.81091e-12	0.731635	5818	PVRL1	poliovirus receptor-related 1 (herpesvirus entry mediator C)
84640	4.83855e-12	0.0359466	84640	USP38	ubiquitin specific peptidase 38
51350	4.86303e-12	0.272276	51350	KRT76	keratin 76
6341	5.44763e-12	0.0948965	6341	SCO1	SCO cytochrome oxidase deficient homolog 1 (yeast)
9456	5.91726e-12	0.126265	9456	HOMER1	homer homolog 1 (Drosophila)
5494	5.98754e-12	0.231299	5494	PPM1A	protein phosphatase, Mg2+/Mn2+ dependent, 1A
56915	6.47999e-12	0.000448862	56915	EXOSC5	exosome component 5
1180	6.96023e-12	0.975612	1180	CLCN1	chloride channel, voltage-sensitive 1
387881	6.99858e-12	0.642171	387881	387881
79140	7.25764e-12	0.978628	79140	CCDC28B	coiled-coil domain containing 28B
10907	7.48954e-12	0.079478	10907	TXNL4A	thioredoxin-like 4A
9531	7.81529e-12	0.112901	9531	BAG3	BCL2-associated athanogene 3
54873	8.3171e-12	0.0368597	54873	PALMD	palmdelphin
7879	8.41776e-12	0.0231448	7879	RAB7A	RAB7A, member RAS oncogene family
55759	8.58511e-12	0.168382	55759	WDR12	WD repeat domain 12
57129	8.7853e-12	1.84194e-06	57129	MRPL47	mitochondrial ribosomal protein L47
2180	9.97671e-12	0.114723	2180	ACSL1	acyl-CoA synthetase long-chain family member 1
2108	1.00206e-11	0.0898305	2108	ETFA	electron-transfer-flavoprotein, alpha polypeptide
147808	1.02026e-11	1	147808	ZNF784	zinc finger protein 784
8987	1.03166e-11	0.135901	8987	STBD1	starch binding domain 1
4552	1.04622e-11	0.111519	4552	MTRR	5-methyltetrahydrofolate-homocysteine methyltransferase reductase
8443	1.31703e-11	0.000137983	8443	GNPAT	glyceronephosphate O-acyltransferase
10755	1.32988e-11	0.494294	10755	GIPC1	GIPC PDZ domain containing family, member 1
5230	1.33957e-11	0.0758821	5230	PGK1	phosphoglycerate kinase 1
57179	1.36651e-11	0.205491	57179	KIAA1191	KIAA1191
7780	1.40078e-11	0.271548	7780	SLC30A2	solute carrier family 30 (zinc transporter), member 2
10245	1.41762e-11	0.164012	10245	TIMM17B	translocase of inner mitochondrial membrane 17 homolog B (yeast)
9054	1.52308e-11	0.131802	9054	NFS1	NFS1 nitrogen fixation 1 homolog (S. cerevisiae)
154091	1.5793e-11	0.963639	154091	SLC2A12	solute carrier family 2 (facilitated glucose transporter), member 12
11261	1.64082e-11	0.0332911	11261	CHP1	calcineurin-like EF hand protein 1
51249	1.64321e-11	0.032845	51249	TMEM69	transmembrane protein 69
254359	1.75117e-11	0.369222	254359	ZDHHC24	zinc finger, DHHC-type containing 24
51	1.92319e-11	0.0651481	51	ACOX1	acyl-CoA oxidase 1, palmitoyl
56922	1.93933e-11	0.000101728	56922	MCCC1	methylcrotonoyl-CoA carboxylase 1 (alpha)
23336	1.97069e-11	0.363693	23336	SYNM	synemin, intermediate filament protein
58510	1.98591e-11	0.745378	58510	PRODH2	proline dehydrogenase (oxidase) 2
1376	2.16583e-11	0.0476653	1376	CPT2	carnitine palmitoyltransferase 2
64793	2.23191e-11	0.0862234	64793	CEP85	centrosomal protein 85kDa
117247	2.54267e-11	0.412293	117247	SLC16A10	solute carrier family 16, member 10 (aromatic amino acid transporter)
55062	2.72079e-11	0.158745	55062	WIPI1	WD repeat domain, phosphoinositide interacting 1
388591	2.85863e-11	0.897542	388591	RNF207	ring finger protein 207
51719	2.86695e-11	0.0383705	51719	CAB39	calcium binding protein 39
10935	2.98418e-11	1	10935	PRDX3	peroxiredoxin 3
5029	3.23752e-11	0.266855	5029	P2RY2	purinergic receptor P2Y, G-protein coupled, 2
5339	3.5004e-11	0.355787	5339	PLEC	plectin
55157	3.54165e-11	2.59036e-05	55157	DARS2	aspartyl-tRNA synthetase 2, mitochondrial
5318	3.61085e-11	0.0503659	5318	PKP2	plakophilin 2
5867	3.87612e-11	0.136433	5867	RAB4A	RAB4A, member RAS oncogene family
2875	3.99171e-11	0.957706	2875	GPT	glutamic-pyruvate transaminase (alanine aminotransferase)
165186	4.09917e-11	0.966618	165186	FAM179A	family with sequence similarity 179, member A
7108	4.48669e-11	0.601563	7108	TM7SF2	transmembrane 7 superfamily member 2
8996	4.57764e-11	0.184282	8996	NOL3	nucleolar protein 3 (apoptosis repressor with CARD domain)
51807	4.5838e-11	0.996919	51807	TUBA8	tubulin, alpha 8
148979	4.6953e-11	0.622508	148979	GLIS1	GLIS family zinc finger 1
50813	4.78306e-11	2.20366e-05	50813	COPS7A	COP9 constitutive photomorphogenic homolog subunit 7A (Arabidopsis)
5639	4.93887e-11	1	5639	PRRG2	proline rich Gla (G-carboxyglutamic acid) 2
5592	5.47085e-11	0.340479	5592	PRKG1	protein kinase, cGMP-dependent, type I
5707	5.66732e-11	0.0390488	5707	PSMD1	proteasome (prosome, macropain) 26S subunit, non-ATPase, 1
79944	6.01606e-11	0.159842	79944	L2HGDH	L-2-hydroxyglutarate dehydrogenase
5524	6.15099e-11	0.327036	5524	PPP2R4	protein phosphatase 2A activator, regulatory subunit 4
146691	6.40285e-11	0.757024	146691	TOM1L2	target of myb1-like 2 (chicken)
7319	6.65491e-11	0.305633	7319	UBE2A	ubiquitin-conjugating enzyme E2A
64798	6.8855e-11	0.152144	64798	DEPTOR	DEP domain containing MTOR-interacting protein
8834	6.97315e-11	0.213455	8834	TMEM11	transmembrane protein 11
54735	6.99837e-11	1	54735	54735
348932	7.13447e-11	0.788146	348932	SLC6A18	solute carrier family 6, member 18
2963	7.39254e-11	0.00124548	2963	GTF2F2	general transcription factor IIF, polypeptide 2, 30kDa
54764	8.66593e-11	0.146995	54764	ZRANB1	zinc finger, RAN-binding domain containing 1
341640	8.88876e-11	1	341640	FREM2	FRAS1 related extracellular matrix protein 2
22885	9.61914e-11	0.184211	22885	ABLIM3	actin binding LIM protein family, member 3
132	9.82178e-11	0.00453667	132	ADK	adenosine kinase
4023	1.01867e-10	0.747693	4023	LPL	lipoprotein lipase
375449	1.04151e-10	0.878325	375449	MAST4	microtubule associated serine/threonine kinase family member 4
283104	1.0509e-10	0.878325	283104	SBF2-AS1	SBF2 antisense RNA 1
6945	1.06823e-10	0.342021	6945	MLX	MAX-like protein X
30968	1.12512e-10	2.00672e-05	30968	STOML2	stomatin (EPB72)-like 2
55325	1.18528e-10	4.30152e-06	55325	UFSP2	UFM1-specific peptidase 2
55848	1.21969e-10	8.61913e-05	55848	PLGRKT	plasminogen receptor, C-terminal lysine transmembrane protein
25906	1.26641e-10	0.000116606	25906	ANAPC15	anaphase promoting complex subunit 15
199699	1.29867e-10	0.975612	199699	DAND5	DAN domain family, member 5
388794	1.32379e-10	0.707085	388794	388794
6100	1.33732e-10	0.195169	6100	RP9	retinitis pigmentosa 9 (autosomal dominant)
340171	1.38429e-10	1	340171	340171
9189	1.4509e-10	0.165998	9189	ZBED1	zinc finger, BED-type containing 1
64928	1.46101e-10	0.0170535	64928	MRPL14	mitochondrial ribosomal protein L14
2873	1.46384e-10	3.20248e-07	2873	GPS1	G protein pathway suppressor 1
126393	1.4661e-10	0.262988	126393	HSPB6	heat shock protein, alpha-crystallin-related, B6
146802	1.57649e-10	0.823069	146802	SLC47A2	solute carrier family 47, member 2
5566	1.58539e-10	0.102596	5566	PRKACA	protein kinase, cAMP-dependent, catalytic, alpha
59335	1.62757e-10	1	59335	PRDM12	PR domain containing 12
2632	1.64298e-10	0.0488184	2632	GBE1	glucan (1,4-alpha-), branching enzyme 1
220213	1.65121e-10	0.0870343	220213	OTUD1	OTU domain containing 1
27112	1.65197e-10	0.969607	27112	FAM155B	family with sequence similarity 155, member B
4946	1.67508e-10	0.461458	4946	OAZ1	ornithine decarboxylase antizyme 1
5576	1.70584e-10	0.114362	5576	PRKAR2A	protein kinase, cAMP-dependent, regulatory, type II, alpha
7803	1.78983e-10	0.489684	7803	PTP4A1	protein tyrosine phosphatase type IVA, member 1
28998	1.795e-10	1.9385e-07	28998	MRPL13	mitochondrial ribosomal protein L13
6535	2.21265e-10	0.59783	6535	SLC6A8	solute carrier family 6 (neurotransmitter transporter, creatine), member 8
1134	2.26165e-10	0.440309	1134	CHRNA1	cholinergic receptor, nicotinic, alpha 1 (muscle)
118487	2.35931e-10	8.73729e-07	118487	CHCHD1	coiled-coil-helix-coiled-coil-helix domain containing 1
25974	2.4549e-10	0.00317706	25974	MMACHC	methylmalonic aciduria (cobalamin deficiency) cblC type, with homocystinuria
27183	2.45559e-10	0.371104	27183	VPS4A	vacuolar protein sorting 4 homolog A (S. cerevisiae)
388387	2.60477e-10	0.199711	388387	LINC00671	long intergenic non-protein coding RNA 671
8615	2.71438e-10	0.0261535	8615	USO1	USO1 vesicle docking protein homolog (yeast)
284669	2.9056e-10	0.996919	284669	LOC284669	uncharacterized LOC284669
150381	2.91269e-10	0.0152189	150381	LOC150381	uncharacterized LOC150381
5434	3.14479e-10	0.0140638	5434	POLR2E	polymerase (RNA) II (DNA directed) polypeptide E, 25kDa
6495	3.16821e-10	0.993847	6495	SIX1	SIX homeobox 1
6443	3.2981e-10	0.108301	6443	SGCB	sarcoglycan, beta (43kDa dystrophin-associated glycoprotein)
222584	3.32753e-10	0.996919	222584	FAM83B	family with sequence similarity 83, member B
11212	3.41491e-10	0.610997	11212	PROSC	proline synthetase co-transcribed homolog (bacterial)
400569	3.49543e-10	0.000423227	400569	MED11	mediator complex subunit 11
1917	3.67135e-10	0.987732	1917	EEF1A2	eukaryotic translation elongation factor 1 alpha 2
55699	3.68927e-10	0.167003	55699	IARS2	isoleucyl-tRNA synthetase 2, mitochondrial
11016	3.87646e-10	0.0267742	11016	ATF7	activating transcription factor 7
55277	3.94836e-10	0.000813087	55277	FGGY	FGGY carbohydrate kinase domain containing
92162	4.04851e-10	0.948874	92162	TMEM88	transmembrane protein 88
7328	4.07317e-10	0.0685887	7328	UBE2H	ubiquitin-conjugating enzyme E2H
129303	4.10247e-10	0.720374	129303	TMEM150A	transmembrane protein 150A
55037	4.21277e-10	0.0368375	55037	PTCD3	pentatricopeptide repeat domain 3
10049	4.45128e-10	0.0399013	10049	DNAJB6	DnaJ (Hsp40) homolog, subfamily B, member 6
9520	4.45128e-10	0.17202	9520	NPEPPS	aminopeptidase puromycin sensitive
286052	4.98232e-10	0.235542	286052	LOC286052	uncharacterized LOC286052
10301	5.00725e-10	0.329696	10301	DLEU1	deleted in lymphocytic leukemia 1 (non-protein coding)
54602	5.17569e-10	0.0527558	54602	NDFIP2	Nedd4 family interacting protein 2
57241	5.19382e-10	0.169118	57241	57241
2063	5.33029e-10	0.125071	2063	NR2F6	nuclear receptor subfamily 2, group F, member 6
7484	5.4964e-10	0.996919	7484	WNT9B	wingless-type MMTV integration site family, member 9B
1744	5.80195e-10	0.0442642	1744	DLSTP1	dihydrolipoamide S-succinyltransferase pseudogene 1
56942	5.81853e-10	2.15081e-06	56942	CMC2	COX assembly mitochondrial protein 2 homolog (S. cerevisiae)
51406	6.68581e-10	0.0431968	51406	NOL7	nucleolar protein 7, 27kDa
4802	6.76294e-10	0.476108	4802	NFYC	nuclear transcription factor Y, gamma
90736	6.97551e-10	0.00130878	90736	FAM104B	family with sequence similarity 104, member B
4809	7.8318e-10	0.207379	4809	NHP2L1	NHP2 non-histone chromosome protein 2-like 1 (S. cerevisiae)
8824	7.85591e-10	0.00378198	8824	CES2	carboxylesterase 2
1259	8.01645e-10	1	1259	CNGA1	cyclic nucleotide gated channel alpha 1
6584	8.27663e-10	0.0358295	6584	SLC22A5	solute carrier family 22 (organic cation/carnitine transporter), member 5
9342	8.6602e-10	0.267088	9342	SNAP29	synaptosomal-associated protein, 29kDa
2029	8.71159e-10	0.0930051	2029	ENSA	endosulfine alpha
388323	8.98626e-10	0.945948	388323	GLTPD2	glycolipid transfer protein domain containing 2
10213	9.05779e-10	0.022661	10213	PSMD14	proteasome (prosome, macropain) 26S subunit, non-ATPase, 14
54675	9.10582e-10	0.117138	54675	CRLS1	cardiolipin synthase 1
9209	9.60828e-10	0.143096	9209	LRRFIP2	leucine rich repeat (in FLII) interacting protein 2
55836	9.71436e-10	0.121301	55836	55836
8087	9.75669e-10	0.214418	8087	FXR1	fragile X mental retardation, autosomal homolog 1
388299	1.01294e-09	0.00430882	388299	388299
79937	1.04695e-09	0.993847	79937	CNTNAP3	contactin associated protein-like 3
51004	1.06028e-09	0.000446209	51004	COQ6	coenzyme Q6 homolog, monooxygenase (S. cerevisiae)
2926	1.10712e-09	0.0804917	2926	GRSF1	G-rich RNA sequence binding factor 1
51184	1.13258e-09	0.00336256	51184	GPN3	GPN-loop GTPase 3
57149	1.22442e-09	0.00468365	57149	LYRM1	LYR motif containing 1
57418	1.28281e-09	0.00441645	57418	WDR18	WD repeat domain 18
154810	1.36769e-09	0.253415	154810	AMOTL1	angiomotin like 1
7053	1.4018e-09	0.996919	7053	TGM3	transglutaminase 3 (E polypeptide, protein-glutamine-gamma-glutamyltransferase)
8816	1.632e-09	0.225944	8816	DCAF5	DDB1 and CUL4 associated factor 5
6262	1.69008e-09	1	6262	RYR2	ryanodine receptor 2 (cardiac)
54508	1.69008e-09	1	54508	FLJ11235	uncharacterized FLJ11235
439	1.70413e-09	1.78604e-05	439	ASNA1	arsA arsenite transporter, ATP-binding, homolog 1 (bacterial)
127707	1.82235e-09	0.164792	127707	KLHDC7A	kelch domain containing 7A
388722	1.84313e-09	0.022745	388722	C1orf53	chromosome 1 open reading frame 53
10490	1.85206e-09	6.09318e-06	10490	VTI1B	vesicle transport through interaction with t-SNAREs homolog 1B (yeast)
788	2.11481e-09	0.072027	788	SLC25A20	solute carrier family 25 (carnitine/acylcarnitine translocase), member 20
37	2.21834e-09	0.253272	37	ACADVL	acyl-CoA dehydrogenase, very long chain
401276	2.25142e-09	1	401276	401276
79591	2.26333e-09	0.273957	79591	C10orf76	chromosome 10 open reading frame 76
3155	2.4009e-09	0.000953087	3155	HMGCL	3-hydroxymethyl-3-methylglutaryl-CoA lyase
7423	2.51847e-09	0.966618	7423	VEGFB	vascular endothelial growth factor B
1286	2.66331e-09	0.996919	1286	COL4A4	collagen, type IV, alpha 4
10627	2.66654e-09	0.274577	10627	MYL12A	myosin, light chain 12A, regulatory, non-sarcomeric
346689	2.68525e-09	0.978628	346689	KLRG2	killer cell lectin-like receptor subfamily G, member 2
7169	2.71172e-09	0.00804416	7169	TPM2	tropomyosin 2 (beta)
390916	2.82953e-09	0.015803	390916	NUDT19	nudix (nucleoside diphosphate linked moiety X)-type motif 19
84266	2.84886e-09	8.11062e-05	84266	ALKBH7	alkB, alkylation repair homolog 7 (E. coli)
10597	2.84974e-09	0.275173	10597	TRAPPC2P1	trafficking protein particle complex 2 pseudogene 1
517	3.0777e-09	0.963639	517	ATP5G2	ATP synthase, H+ transporting, mitochondrial Fo complex, subunit C2 (subunit 9)
146336	3.12446e-09	0.328908	146336	SSTR5-AS1	SSTR5 antisense RNA 1
55328	3.26191e-09	0.207591	55328	RNLS	renalase, FAD-dependent amine oxidase
158	3.31162e-09	0.00988833	158	ADSL	adenylosuccinate lyase
3336	3.6561e-09	0.00926969	3336	HSPE1	heat shock 10kDa protein 1 (chaperonin 10)
10849	4.00951e-09	0.0543357	10849	CD3EAP	CD3e molecule, epsilon associated protein
55437	4.05477e-09	2.54131e-05	55437	STRADB	STE20-related kinase adaptor beta
6920	4.09172e-09	0.0842704	6920	TCEA3	transcription elongation factor A (SII), 3
5350	4.0939e-09	1	5350	PLN	phospholamban
23600	4.39574e-09	0.123736	23600	AMACR	alpha-methylacyl-CoA racemase
2230	4.40979e-09	0.000151244	2230	FDX1	ferredoxin 1
135250	4.52249e-09	1	135250	RAET1E	retinoic acid early transcript 1E
9040	4.6083e-09	0.0673371	9040	UBE2M	ubiquitin-conjugating enzyme E2M
84069	5.08262e-09	0.364754	84069	PLEKHN1	pleckstrin homology domain containing, family N member 1
55586	5.21501e-09	0.583124	55586	MIOX	myo-inositol oxygenase
90624	5.24392e-09	0.141522	90624	LYRM7	Lyrm7 homolog (mouse)
5504	5.27287e-09	0.218142	5504	PPP1R2	protein phosphatase 1, regulatory (inhibitor) subunit 2
9791	6.34735e-09	0.168478	9791	PTDSS1	phosphatidylserine synthase 1
5702	6.45511e-09	2.77962e-07	5702	PSMC3	proteasome (prosome, macropain) 26S subunit, ATPase, 3
51281	6.63759e-09	0.984688	51281	ANKMY1	ankyrin repeat and MYND domain containing 1
23583	6.72578e-09	0.00149537	23583	SMUG1	single-strand-selective monofunctional uracil-DNA glycosylase 1
7251	6.73392e-09	0.658339	7251	TSG101	tumor susceptibility gene 101
3679	6.94261e-09	0.270563	3679	ITGA7	integrin, alpha 7
401505	7.18442e-09	0.993847	401505	TOMM5	translocase of outer mitochondrial membrane 5 homolog (yeast)
84288	7.18625e-09	0.0457993	84288	EFCAB2	EF-hand calcium binding domain 2
5500	7.41741e-09	0.0348278	5500	PPP1CB	protein phosphatase 1, catalytic subunit, beta isozyme
7051	7.70705e-09	0.996919	7051	TGM1	transglutaminase 1 (K polypeptide epidermal type I, protein-glutamine-gamma-glutamyltransferase)
27351	8.21741e-09	0.00574274	27351	DESI1	desumoylating isopeptidase 1
55745	8.22801e-09	0.0985485	55745	AP5M1	adaptor-related protein complex 5, mu 1 subunit
152100	8.78869e-09	3.12014e-05	152100	CMC1	COX assembly mitochondrial protein 1 homolog (S. cerevisiae)
27244	8.94945e-09	0.36318	27244	SESN1	sestrin 1
55816	1.00599e-08	0.338346	55816	DOK5	docking protein 5
27295	1.0318e-08	0.825621	27295	PDLIM3	PDZ and LIM domain 3
2273	1.07232e-08	0.296463	2273	FHL1	four and a half LIM domains 1
3895	1.08157e-08	0.00208568	3895	KTN1	kinectin 1 (kinesin receptor)
91039	1.1164e-08	0.148083	91039	DPP9	dipeptidyl-peptidase 9
84881	1.1258e-08	0.140043	84881	RPUSD4	RNA pseudouridylate synthase domain containing 4
78986	1.14307e-08	0.996919	78986	DUSP26	dual specificity phosphatase 26 (putative)
50808	1.14885e-08	0.0191143	50808	AK3	adenylate kinase 3
127002	1.15246e-08	1	127002	ATXN7L2	ataxin 7-like 2
5706	1.16632e-08	0.17388	5706	PSMC6	proteasome (prosome, macropain) 26S subunit, ATPase, 6
4636	1.21252e-08	0.0268086	4636	MYL5	myosin, light chain 5, regulatory
5441	1.25907e-08	6.69994e-07	5441	POLR2L	polymerase (RNA) II (DNA directed) polypeptide L, 7.6kDa
10529	1.26557e-08	0.312084	10529	NEBL	nebulette
390502	1.26617e-08	0.483604	390502	SERPINA2	serpin peptidase inhibitor, clade A (alpha-1 antiproteinase, antitrypsin), member 2
161823	1.28291e-08	0.993847	161823	ADAL	adenosine deaminase-like
79064	1.32594e-08	0.219921	79064	TMEM223	transmembrane protein 223
4654	1.36452e-08	0.889256	4654	MYOD1	myogenic differentiation 1
51126	1.38656e-08	0.196622	51126	NAA20	N(alpha)-acetyltransferase 20, NatB catalytic subunit
4508	1.43872e-08	0.0871951	4508	ATP6	ATP synthase F0 subunit 6
2256	1.48269e-08	0.5344	2256	FGF11	fibroblast growth factor 11
27067	1.48982e-08	0.176316	27067	STAU2	staufen, RNA binding protein, homolog 2 (Drosophila)
5664	1.55689e-08	0.139415	5664	PSEN2	presenilin 2 (Alzheimer disease 4)
6097	1.60867e-08	0.810426	6097	RORC	RAR-related orphan receptor C
54938	1.67639e-08	0.00514738	54938	SARS2	seryl-tRNA synthetase 2, mitochondrial
55061	1.71566e-08	0.828181	55061	SUSD4	sushi domain containing 4
2475	1.71677e-08	0.996919	2475	MTOR	mechanistic target of rapamycin (serine/threonine kinase)
10498	1.82566e-08	0.148122	10498	CARM1	coactivator-associated arginine methyltransferase 1
54346	1.90161e-08	0.736188	54346	UNC93A	unc-93 homolog A (C. elegans)
57533	1.91408e-08	0.163491	57533	TBC1D14	TBC1 domain family, member 14
389039	1.95299e-08	0.0711139	389039	389039
9166	1.97535e-08	0.0380297	9166	EBAG9	estrogen receptor binding site associated, antigen, 9
91624	1.99954e-08	0.198182	91624	NEXN	nexilin (F actin binding protein)
1824	2.01185e-08	0.514765	1824	DSC2	desmocollin 2
7189	2.05207e-08	0.033236	7189	TRAF6	TNF receptor-associated factor 6, E3 ubiquitin protein ligase
140467	2.37781e-08	0.227544	140467	ZNF358	zinc finger protein 358
124961	2.45325e-08	1	124961	ZFP3	zinc finger protein 3 homolog (mouse)
3850	2.47309e-08	0.963639	3850	KRT3	keratin 3
285023	2.50293e-08	1	285023	285023
5825	2.61334e-08	0.165914	5825	ABCD3	ATP-binding cassette, sub-family D (ALD), member 3
51458	2.72662e-08	0.275725	51458	RHCG	Rh family, C glycoprotein
51530	2.80115e-08	0.0970334	51530	ZC3HC1	zinc finger, C3HC-type containing 1
9637	2.87334e-08	0.766469	9637	FEZ2	fasciculation and elongation protein zeta 2 (zygin II)
6493	2.9572e-08	0.102882	6493	SIM2	single-minded homolog 2 (Drosophila)
389734	3.12406e-08	1	389734	389734
388227	3.23567e-08	0.773628	388227	388227
79165	3.34755e-08	0.27257	79165	LENG1	leukocyte receptor cluster (LRC) member 1
7263	3.5008e-08	0.00126422	7263	TST	thiosulfate sulfurtransferase (rhodanese)
83734	3.93428e-08	0.19218	83734	ATG10	autophagy related 10
3939	3.93514e-08	0.11728	3939	LDHA	lactate dehydrogenase A
57665	4.01131e-08	0.0435492	57665	RDH14	retinol dehydrogenase 14 (all-trans/9-cis/11-cis)
23412	4.04702e-08	1.00798e-06	23412	COMMD3	COMM domain containing 3
10120	4.15316e-08	0.0458303	10120	ACTR1B	ARP1 actin-related protein 1 homolog B, centractin beta (yeast)
112817	4.9705e-08	0.0582742	112817	HOGA1	4-hydroxy-2-oxoglutarate aldolase 1
63914	5.12243e-08	1	63914	C6orf164	chromosome 6 open reading frame 164
5797	5.1372e-08	0.367851	5797	PTPRM	protein tyrosine phosphatase, receptor type, M
8218	5.17481e-08	0.993847	8218	CLTCL1	clathrin, heavy chain-like 1
7866	5.23526e-08	0.170935	7866	IFRD2	interferon-related developmental regulator 2
113829	5.41022e-08	0.231538	113829	SLC35A4	solute carrier family 35, member A4
1674	5.51811e-08	0.30788	1674	DES	desmin
1397	5.53456e-08	0.257397	1397	CRIP2	cysteine-rich protein 2
164237	5.7993e-08	1	164237	WFDC13	WAP four-disulfide core domain 13
79894	5.87346e-08	0.368563	79894	ZNF672	zinc finger protein 672
23038	5.91087e-08	0.224546	23038	WDTC1	WD and tetratricopeptide repeats 1
283871	6.00173e-08	0.0637245	283871	PGP	phosphoglycolate phosphatase
55317	6.03093e-08	0.447251	55317	AP5S1	adaptor-related protein complex 5, sigma 1 subunit
150383	6.08084e-08	0.908708	150383	CDPF1	cysteine-rich, DPF motif domain containing 1
5608	6.305e-08	0.544492	5608	MAP2K6	mitogen-activated protein kinase kinase 6
23332	6.418e-08	0.0456371	23332	CLASP1	cytoplasmic linker associated protein 1
114049	6.78185e-08	0.978628	114049	WBSCR22	Williams Beuren syndrome chromosome region 22
8976	6.79453e-08	0.0410073	8976	WASL	Wiskott-Aldrich syndrome-like
29104	6.86503e-08	0.0979632	29104	N6AMT1	N-6 adenine-specific DNA methyltransferase 1 (putative)
64969	6.89714e-08	0.0442919	64969	MRPS5	mitochondrial ribosomal protein S5
150684	6.94169e-08	3.46712e-07	150684	COMMD1	copper metabolism (Murr1) domain containing 1
10057	7.05673e-08	0.766469	10057	ABCC5	ATP-binding cassette, sub-family C (CFTR/MRP), member 5
150678	7.06159e-08	1	150678	MYEOV2	myeloma overexpressed 2
84909	7.12205e-08	0.12896	84909	C9orf3	chromosome 9 open reading frame 3
84305	7.20954e-08	0.0014534	84305	WIBG	within bgcn homolog (Drosophila)
23281	7.96272e-08	0.996919	23281	MTUS2	microtubule associated tumor suppressor candidate 2
400605	8.11094e-08	1	400605	400605
254773	8.51135e-08	1	254773	LYG2	lysozyme G-like 2
4670	8.82551e-08	0.894772	4670	HNRNPM	heterogeneous nuclear ribonucleoprotein M
56911	9.1907e-08	0.599694	56911	C21orf7	chromosome 21 open reading frame 7
51234	9.30694e-08	5.56579e-05	51234	EMC4	ER membrane protein complex subunit 4
7306	9.61326e-08	1	7306	TYRP1	tyrosinase-related protein 1
10140	9.69232e-08	0.390904	10140	TOB1	transducer of ERBB2, 1
162514	9.75893e-08	0.0770348	162514	TRPV3	transient receptor potential cation channel, subfamily V, member 3
29780	9.83068e-08	0.356893	29780	PARVB	parvin, beta

## Sheet: Only in chemicals
GENEID	Normal tissues	Chemicals	Entrez Gene ID	symbol	function
170712	0.0567797	0	170712	COX7B2	cytochrome c oxidase subunit VIIb2
2517	0.000335093	1.09e-27	2517	FUCA1	fucosidase, alpha-L- 1, tissue
400948	0.0128672	1.45e-26	400948	400948
5720	0.000878833	1.3e-23	5720	PSME1	proteasome (prosome, macropain) activator subunit 1 (PA28 alpha)
374882	0.00525973	1.89e-23	374882	TMEM205	transmembrane protein 205
392758	0.0693765	1.05e-20	392758	392758
5204	7.68e-05	1.96e-20	5204	PFDN5	prefoldin subunit 5
3028	6.26e-05	2.16e-20	3028	HSD17B10	hydroxysteroid (17-beta) dehydrogenase 10
51248	6.8e-06	9.07e-20	51248	PDZD11	PDZ domain containing 11
6146	0.00160261	2.55e-19	6146	RPL22	ribosomal protein L22
10467	0.0733136	5.1e-19	10467	ZNHIT1	zinc finger, HIT-type containing 1
7979	0.0570174	6.7e-19	7979	SHFM1	split hand/foot malformation (ectrodactyly) type 1
54344	0.0374471	9.2e-18	54344	DPM3	dolichyl-phosphate mannosyltransferase polypeptide 3
27243	0.000194613	4.32e-17	27243	CHMP2A	charged multivesicular body protein 2A
197370	0.0888814	4.53e-17	197370	NSMCE1	non-SMC element 1 homolog (S. cerevisiae)
2197	0.0034389	1.07e-16	2197	FAU	Finkel-Biskis-Reilly murine sarcoma virus (FBR-MuSV) ubiquitously expressed
254863	0.108729	2.02e-16	254863	C17orf61	chromosome 17 open reading frame 61
51398	0.00462352	2.14e-16	51398	WDR83OS	WD repeat domain 83 opposite strand
154467	0.169124	2.79e-16	154467	CCDC167	coiled-coil domain containing 167
11267	5.1e-05	3.85e-16	11267	SNF8	SNF8, ESCRT-II complex subunit, homolog (S. cerevisiae)
5721	0.000236328	5.45e-16	5721	PSME2	proteasome (prosome, macropain) activator subunit 2 (PA28 beta)
51507	0.00105276	7.07e-16	51507	C20orf43	chromosome 20 open reading frame 43
51596	0.0910574	1.53e-15	51596	CUTA	cutA divalent cation tolerance homolog (E. coli)
5435	0.000288773	1.04e-14	5435	POLR2F	polymerase (RNA) II (DNA directed) polypeptide F
3281	1.61e-07	1.23e-14	3281	HSBP1	heat shock factor binding protein 1
6633	0.0221799	1.32e-14	6633	SNRPD2	small nuclear ribonucleoprotein D2 polypeptide 16.5kDa
51374	0.0623197	1.48e-14	51374	ATRAID	all-trans retinoic acid-induced differentiation factor
684	0.000247524	2.51e-14	684	BST2	bone marrow stromal cell antigen 2
140823	0.000294068	2.67e-14	140823	ROMO1	reactive oxygen species modulator 1
1603	0.0111676	2.74e-14	1603	DAD1	defender against cell death 1
126003	0.0109352	8.62e-14	126003	TRAPPC5	trafficking protein particle complex 5
6227	0.000720914	1.02e-13	6227	RPS21	ribosomal protein S21
29082	0.019654	1.22e-13	29082	CHMP4A	charged multivesicular body protein 4A
8667	0.000746587	1.55e-13	8667	EIF3H	eukaryotic translation initiation factor 3, subunit H
54460	0.0185382	2.49e-13	54460	MRPS21	mitochondrial ribosomal protein S21
85437	0.0888331	3.5e-13	85437	ZCRB1	zinc finger CCHC-type and RNA binding motif 1
5920	0.00220569	6.28e-13	5920	RARRES3	retinoic acid receptor responder (tazarotene induced) 3
1069	0.0271869	9.54e-13	1069	CETN2	centrin, EF-hand protein, 2
5303	0.00266608	2.42e-12	5303	PIN4	protein (peptidylprolyl cis/trans isomerase) NIMA-interacting, 4 (parvulin)
2286	0.0529765	4.15e-12	2286	FKBP2	FK506 binding protein 2, 13kDa
1798	0.00102475	5.5e-12	1798	DPAGT1	dolichyl-phosphate (UDP-N-acetylglucosamine) N-acetylglucosaminephosphotransferase 1 (GlcNAc-1-P transferase)
10400	0.0632663	6.38e-12	10400	PEMT	phosphatidylethanolamine N-methyltransferase
64374	0.020536	7.73e-12	64374	SIL1	SIL1 homolog, endoplasmic reticulum chaperone (S. cerevisiae)
55651	0.0799907	9.22e-12	55651	NHP2	NHP2 ribonucleoprotein homolog (yeast)
25915	4.51e-07	1.32e-11	25915	NDUFAF3	NADH dehydrogenase (ubiquinone) complex I, assembly factor 3
51019	0.148385	1.41e-11	51019	CCDC53	coiled-coil domain containing 53
6223	5.06e-05	1.66e-11	6223	RPS19	ribosomal protein S19
23474	0.0455588	2.43e-11	23474	ETHE1	ethylmalonic encephalopathy 1
373156	0.0053748	3.49e-11	373156	GSTK1	glutathione S-transferase kappa 1
8409	0.00514126	3.8e-11	8409	UXT	ubiquitously-expressed, prefoldin-like chaperone
5436	0.00724603	4.18e-11	5436	POLR2G	polymerase (RNA) II (DNA directed) polypeptide G
6748	7.88e-05	4.36e-11	6748	SSR4	signal sequence receptor, delta
54958	0.0343304	4.48e-11	54958	TMEM160	transmembrane protein 160
2954	8.26e-05	5.48e-11	2954	GSTZ1	glutathione S-transferase zeta 1
404672	1.66e-07	7.05e-11	404672	GTF2H5	general transcription factor IIH, polypeptide 5
6204	0.00125908	8.25e-11	6204	RPS10	ribosomal protein S10
5691	1.14e-05	9.14e-11	5691	PSMB3	proteasome (prosome, macropain) subunit, beta type, 3
4255	0.0897059	9.19e-11	4255	MGMT	O-6-methylguanine-DNA methyltransferase
170622	0.000203928	9.95e-11	170622	COMMD6	COMM domain containing 6
10247	5.66e-07	1.11e-10	10247	HRSP12	heat-responsive protein 12
55505	0.0752073	1.12e-10	55505	NOP10	NOP10 ribonucleoprotein homolog (yeast)
80011	0.111158	1.12e-10	80011	FAM192A	family with sequence similarity 192, member A
6284	0.0371525	1.29e-10	6284	S100A13	S100 calcium binding protein A13
1175	0.124636	1.43e-10	1175	AP2S1	adaptor-related protein complex 2, sigma 1 subunit
5510	0.0397925	2.92e-10	5510	PPP1R7	protein phosphatase 1, regulatory subunit 7
56851	1.96e-07	3.68e-10	56851	EMC7	ER membrane protein complex subunit 7
54059	0.00189709	3.92e-10	54059	YBEY	ybeY metallopeptidase (putative)
11079	0.0776368	4.85e-10	11079	RER1	RER1 retention in endoplasmic reticulum 1 homolog (S. cerevisiae)
51463	0.00162501	4.92e-10	51463	GPR89B	G protein-coupled receptor 89B
415	0.0693561	5.02e-10	415	ARSE	arylsulfatase E (chondrodysplasia punctata 1)
353	0.000860326	5.12e-10	353	APRT	adenine phosphoribosyltransferase
10134	0.00259148	5.4e-10	10134	BCAP31	B-cell receptor-associated protein 31
56954	0.00599628	7.98e-10	56954	NIT2	nitrilase family, member 2
153527	0.0107863	8.68e-10	153527	ZMAT2	zinc finger, matrin-type 2
5547	0.00501784	8.86e-10	5547	PRCP	prolylcarboxypeptidase (angiotensinase C)
55049	3.74e-05	9.42e-10	55049	C19orf60	chromosome 19 open reading frame 60
6136	0.000448979	1.21e-09	6136	RPL12	ribosomal protein L12
3385	0.00144219	1.26e-09	3385	ICAM3	intercellular adhesion molecule 3
83443	0.0516807	1.44e-09	83443	SF3B5	splicing factor 3b, subunit 5, 10kDa
4913	0.0692563	1.46e-09	4913	NTHL1	nth endonuclease III-like 1 (E. coli)
6169	0.00046875	1.66e-09	6169	RPL38	ribosomal protein L38
10901	7.82e-05	1.74e-09	10901	DHRS4	dehydrogenase/reductase (SDR family) member 4
5092	1.78e-06	2.2e-09	5092	PCBD1	pterin-4 alpha-carbinolamine dehydratase/dimerization cofactor of hepatocyte nuclear factor 1 alpha
25979	0.000559193	2.49e-09	25979	DHRS7B	dehydrogenase/reductase (SDR family) member 7B
51504	0.00138524	2.6e-09	51504	TRMT112	tRNA methyltransferase 11-2 homolog (S. cerevisiae)
866	0.202123	3.92e-09	866	SERPINA6	serpin peptidase inhibitor, clade A (alpha-1 antiproteinase, antitrypsin), member 6
55486	0.130618	4.49e-09	55486	PARL	presenilin associated, rhomboid-like
10791	0.0401602	4.85e-09	10791	VAMP5	vesicle-associated membrane protein 5 (myobrevin)
7311	0.000136164	5.13e-09	7311	UBA52	ubiquitin A-52 residue ribosomal protein fusion product 1
79004	0.00203642	5.57e-09	79004	CUEDC2	CUE domain containing 2
84313	0.0310652	5.93e-09	84313	VPS25	vacuolar protein sorting 25 homolog (S. cerevisiae)
51372	0.0150714	6.58e-09	51372	TMA7	translational machinery associated 7 homolog (S. cerevisiae)
5919	0.00119842	8.42e-09	5919	RARRES2	retinoic acid receptor responder (tazarotene induced) 2
84817	0.0760598	8.7e-09	84817	TXNDC17	thioredoxin domain containing 17
51011	0.0186641	9.3e-09	51011	FAHD2A	fumarylacetoacetate hydrolase domain containing 2A
6415	0.000111826	1.11e-08	6415	SEPW1	selenoprotein W, 1
6235	0.000679334	1.18e-08	6235	RPS29	ribosomal protein S29
51657	0.000663776	1.18e-08	51657	STYXL1	serine/threonine/tyrosine interacting-like 1
51642	1.65e-06	1.25e-08	51642	MRPL48	mitochondrial ribosomal protein L48
55851	0.070861	1.25e-08	55851	PSENEN	presenilin enhancer 2 homolog (C. elegans)
1512	0.00682078	1.3e-08	1512	CTSH	cathepsin H
55766	0.0028849	1.32e-08	55766	H2AFJ	H2A histone family, member J
116541	0.00382564	1.44e-08	116541	MRPL54	mitochondrial ribosomal protein L54
115024	0.0293351	1.52e-08	115024	NT5C3L	5'-nucleotidase, cytosolic III-like
79921	0.000409576	1.63e-08	79921	TCEAL4	transcription elongation factor A (SII)-like 4
2876	0.0556173	1.7e-08	2876	GPX1	glutathione peroxidase 1
10005	0.0500874	1.75e-08	10005	ACOT8	acyl-CoA thioesterase 8
29058	0.0647015	2.09e-08	29058	TMEM230	transmembrane protein 230
1716	0.0220452	2.24e-08	1716	DGUOK	deoxyguanosine kinase
65003	0.00014283	4.89e-08	65003	MRPL11	mitochondrial ribosomal protein L11
9045	0.0008266	5.62e-08	9045	RPL14	ribosomal protein L14
6159	0.00181532	5.7e-08	6159	RPL29	ribosomal protein L29
8635	0.00238651	6.8e-08	8635	RNASET2	ribonuclease T2
4831	0.0845664	7.05e-08	4831	NME2	NME/NM23 nucleoside diphosphate kinase 2
26063	0.000116715	7.49e-08	26063	DECR2	2,4-dienoyl CoA reductase 2, peroxisomal
2203	0.068479	8.13e-08	2203	FBP1	fructose-1,6-bisphosphatase 1
5872	0.00404981	8.78e-08	5872	RAB13	RAB13, member RAS oncogene family
66005	0.0549144	8.81e-08	66005	CHID1	chitinase domain containing 1
9577	1.88e-05	8.99e-08	9577	BRE	brain and reproductive organ-expressed (TNFRSF1A modulator)
2519	0.00355087	9.2e-08	2519	FUCA2	fucosidase, alpha-L- 2, plasma
55644	0.000310997	9.2e-08	55644	OSGEP	O-sialoglycoprotein endopeptidase
6161	0.000437212	9.3e-08	6161	RPL32	ribosomal protein L32
9158	0.104321	9.44e-08	9158	FIBP	fibroblast growth factor (acidic) intracellular binding protein
119504	0.0542303	9.57e-08	119504	ANAPC16	anaphase promoting complex subunit 16
